# Supplementary material for: Facile one-pot generation of metal oxide/hydroxide@metal–organic framework composites: highly efficient bifunctional electrocatalysts for overall water splitting
Source: Royal Society of Chemistry journal article supplement (doi:10.1039/c9cc06113d), 2019-01-01
Supplement: c9cc06113d1.pdf [file c9cc06113d1.pdf]

## Supporting Information

### **Facile one-pot generation of metal oxide/hydroxide@metal-organic framework composites: highly efficient bifunctional electrocatalysts for overall water splitting**

Shasha Zheng<sup>a</sup>, Xiaotian Guo<sup>a</sup>, Huaiguo Xue<sup>a</sup>, Kunming Pan<sup>b</sup>, Chunsen Liu<sup>c</sup>, Huan Pang<sup>a,\*</sup>

<sup>a</sup>School of Chemistry and Chemical Engineering, and Institute for Innovative Materials and Energy, Yangzhou University, Yangzhou, 225009, Jiangsu, P. R. China.

<sup>b</sup>National Joint Engineering Research Center for Abrasion Control and Molding of Metal Materials, Henan University of Science and Technology, Luoyang 471003, China.

<sup>c</sup>Henan Provincial Key Laboratory of Surface & Interface Science, Zhengzhou University of Light Industry, Zhengzhou 450002, P. R. China.

\*Corresponding author. E-mail: [huanpangchem@hotmail.com](mailto:huanpangchem@hotmail.com); [panghuan@yzu.edu.cn](mailto:panghuan@yzu.edu.cn);

## Content

|                                                                                                                                               |    |
|-----------------------------------------------------------------------------------------------------------------------------------------------|----|
| 1. Experimental section .....                                                                                                                 | 2  |
| 2. SEM images of $\text{Co}_3\text{O}_4$ .....                                                                                                | 5  |
| 3. TG curve of $\text{Co}_3\text{O}_4$ @Co-MOF-12.....                                                                                        | 6  |
| 4. SEM image of $\text{Co}_3\text{O}_4$ +Co-MOF.....                                                                                          | 8  |
| 5. SEM images of Co-based MOFs for different mole ratio of ptcda and NaOH .....                                                               | 9  |
| 6. XRD patterns of Co-based MOFs for different mole ratio of ptcda and NaOH .....                                                             | 11 |
| 7. SEM images of $\text{Co}_3\text{O}_4$ @Co-MOF for different times .....                                                                    | 12 |
| 8. XRD patterns of $\text{Co}_3\text{O}_4$ @Co-MOF for different times.....                                                                   | 14 |
| 9. The possible formation mechanism for the composite .....                                                                                   | 15 |
| 10. XRD patterns of Ni-MOF and $\text{Ni}(\text{OH})_2$ @Ni-MOF.....                                                                          | 17 |
| 11. XRD patterns of Fe-MOF and $\text{Fe}_2\text{O}_3$ @Fe-MOF .....                                                                          | 18 |
| 12. IR pattern.....                                                                                                                           | 19 |
| 13. XRD pattern of $\text{Co}_3\text{O}_4$ .....                                                                                              | 20 |
| 14. XRD pattern of $\text{Co}_3\text{O}_4$ +Co-MOF.....                                                                                       | 21 |
| 15. XPS spectra of the Co 2p .....                                                                                                            | 22 |
| 16. XPS spectra .....                                                                                                                         | 23 |
| 17. XPS spectra of the O 1s .....                                                                                                             | 24 |
| 18. BET .....                                                                                                                                 | 25 |
| 19. Pore size distribution .....                                                                                                              | 26 |
| 20. The LSV curves of the $\text{Co}_3\text{O}_4$ @Co-MOF-12 before and after iR corrections .....                                            | 27 |
| 21. OER performance of $\text{RuO}_2$ and $\text{Co}_3\text{O}_4$ @Co-MOF-t .....                                                             | 28 |
| 22. CV curves .....                                                                                                                           | 29 |
| 23. The electrochemical impedance spectra of $\text{Co}_3\text{O}_4$ @Co-MOF for different times .....                                        | 30 |
| 24. The electrochemical impedance spectra .....                                                                                               | 31 |
| 25. The electrochemical impedance spectra before and after cycling .....                                                                      | 32 |
| 26. HER .....                                                                                                                                 | 33 |
| 27. HER performance of Pt/C and $\text{Co}_3\text{O}_4$ @Co-MOF-12 .....                                                                      | 34 |
| 28. LSV curves of $\text{Co}_3\text{O}_4$ @Co-MOF-12 in a two-electrode system .....                                                          | 35 |
| 29. LSV curves of $\text{Co}_3\text{O}_4$ @Co-MOF-12 in a two-electrode system .....                                                          | 36 |
| 30. LSV curves of $\text{Co}_3\text{O}_4$ @Co-MOF-12 in a three-electrode system.....                                                         | 37 |
| 31. Comparison of the OER activities of $\text{Co}_3\text{O}_4$ @Co-MOF-12 and recently reported active catalysts.....                        | 38 |
| 32. Comparison of the overall water splitting performances of $\text{Co}_3\text{O}_4$ @Co-MOF-12 and recently reported active catalysts ..... | 39 |
| 33. References .....                                                                                                                          | 40 |

## 1. Experimental section

### ***Chemicals and Characterizations:***

All chemicals, perylene-3,4,9,10-tetracarboxylic dianhydride (ptcda, 98%), cobalt acetate tetrahydrate ( $\text{Co}(\text{AC})_2 \cdot 4\text{H}_2\text{O}$ ), and sodium hydroxide (NaOH, 96%), were purchased from Shanghai Sinopharm Chemical Reagent Co. and used without further purification. The morphological features were characterized by field emission scanning electron microscopy (FESEM, Zeiss-Supra55), high resolution transmission electron microscopy (HRTEM, Tecnai G2 F30 S-TWIN), and energy dispersive X-ray spectrometry (EDS) mapping. X-ray diffraction (XRD) patterns were examined on a Bruker D8 Advanced X-ray Diffractometer (Cu-K $\alpha$  radiation:  $\lambda = 0.15406$  nm). The chemical states were measured using an Axis Ultra X-ray photoelectron spectroscope (XPS, Kratos Analytical Ltd., UK) equipped with a standard monochromatic Al-K $\alpha$  source ( $h\nu = 1486.6$  eV).  $\text{N}_2$  adsorption-desorption measurements were performed on Quantachrome Instruments, Autosorb IQ3. The thermogravimetric analysis (TGA) was performed under air atmosphere with a heating rate of 5 °C/min by using a Pyris 1 TGA thermogravimetric analyzer.

### ***Materials synthesis:***

**Synthesis of Co-MOF.** In a typical synthesis, ptcda (0.2 mmol), NaOH (0.8 mmol), and  $\text{Co}(\text{CH}_3\text{COO})_2 \cdot 4\text{H}_2\text{O}$  (0.2 mmol) were dissolved in 35 mL deionized water with magnetic stirring at room temperature. Subsequently, the mixture was transformed into a Teflon-lined stainless steel autoclave. The autoclave was maintained at 100 °C for 12 h, and then naturally cooled to room temperature. The resulting precipitate was thoroughly washed several times with deionized water and alcohol, respectively.

**Synthesis of  $\text{Co}_3\text{O}_4$ @Co-MOF.**  $\text{Co}_3\text{O}_4$ @Co-MOF was synthesised using a similar procedure to that described above, except for the use of ptcda and NaOH with a mole ratio of 1 : 6. The

Co<sub>3</sub>O<sub>4</sub>@Co-MOF composites synthesized at reaction time of 4 h, 8 h, 12 h, and 18 h are referred to as Co<sub>3</sub>O<sub>4</sub>@Co-MOF-4, Co<sub>3</sub>O<sub>4</sub>@Co-MOF-8, Co<sub>3</sub>O<sub>4</sub>@Co-MOF-12, and Co<sub>3</sub>O<sub>4</sub>@Co-MOF-18, respectively.

**Synthesis of Co<sub>3</sub>O<sub>4</sub>.** The preparation process of Co<sub>3</sub>O<sub>4</sub> was same as that of Co<sub>3</sub>O<sub>4</sub>@Co-MOF-12, except that ptcds is removed.

**Synthesis of Co<sub>3</sub>O<sub>4</sub>+Co-MOF.** Co<sub>3</sub>O<sub>4</sub> nanocube and Co-MOF with a mole ratio of 1.5 : 1 (mass ratio of 1 : 4) were dispersed into 20 mL ethanol, and then was stirred for 30 min to form a black mixture. The obtained mixture was filtered, and dried in air naturally.

**Synthesis of Ni-MOF and Fe-MOF.** Ni-MOF and Fe-MOF were synthesized by a method analogous to that of Co-MOF, except that Ni(AC)<sub>2</sub>·4H<sub>2</sub>O and FeSO<sub>4</sub>·7H<sub>2</sub>O were used as the metal source, respectively.

**Synthesis of Ni(OH)<sub>2</sub>@Ni-MOF and Fe<sub>2</sub>O<sub>3</sub>@Fe-MOF.** Ni(OH)<sub>2</sub>@Ni-MOF and Fe<sub>2</sub>O<sub>3</sub>@Fe-MOF were synthesized by a method analogous to that of Co<sub>3</sub>O<sub>4</sub>@Co-MOF, except that Ni(AC)<sub>2</sub>·4H<sub>2</sub>O and FeSO<sub>4</sub>·7H<sub>2</sub>O were used as the metal source, respectively.

#### ***Electrochemical Measurements:***

Electrochemical measurements were conducted on a CHI 760e electrochemical station (CH Instruments, Shanghai, China). A conventional three-electrode system was used for the electrochemical measurements at room temperature (25 °C). A glassy carbon (GC, diameter with 3 mm) electrode coated with catalysts was used as the working electrode, an Hg/HgO electrode as the reference electrode, and graphite rod as the auxiliary electrode. The as-prepared catalysts were suspended in 1% Nafion solution (4 mg mL<sup>-1</sup>). Before modification, the glassy carbon electrode (GCE, diameter with 3 mm) was polished with 0.3 μm Al<sub>2</sub>O<sub>3</sub> slurry, later ultrasonic cleaning with ethanol and water. Then, 5 μL of the above suspension was added onto the GC surface and dried at room temperature. The catalyst loading density was

determined to be  $\approx 0.28 \text{ mg cm}^{-2}$ . All potential measurements were converted to the RHE based on the following formula  $E_{\text{vs RHE}} = E_{\text{vs Hg/HgO}} + E_{\text{Hg/HgO}}^{\theta} + 0.059 \times \text{pH}$ . The electrochemical experiments were performed in  $\text{O}_2$ -saturated 1.0 M KOH electrolyte for OER. The HER measurements were carried in  $\text{N}_2$ -saturated 1.0 M KOH electrolyte. Linear sweep voltammetry (LSV) polarization curves were performed at a scan rate of  $5 \text{ mV s}^{-1}$  with 95% iR-compensation unless specifically indicated. Furthermore, the Tafel slope of these samples was obtained by fitting the experimental data with the equation  $\eta = a + b \log |j|$ , where  $\eta$  is the overpotential,  $b$  is the Tafel slope, and  $j$  is the current density. Electrochemical impedance spectroscopy (EIS) measurements were performed at open circuit voltage in the frequency range of 100 kHz to 0.01 Hz in 1.0 M KOH. The overall water splitting test was performed in a two-electrode system, using two symmetric  $\text{Co}_3\text{O}_4@\text{Co-MOF-12}$  electrodes with nickel foam as the carrier.

## 2. SEM images of $\text{Co}_3\text{O}_4$

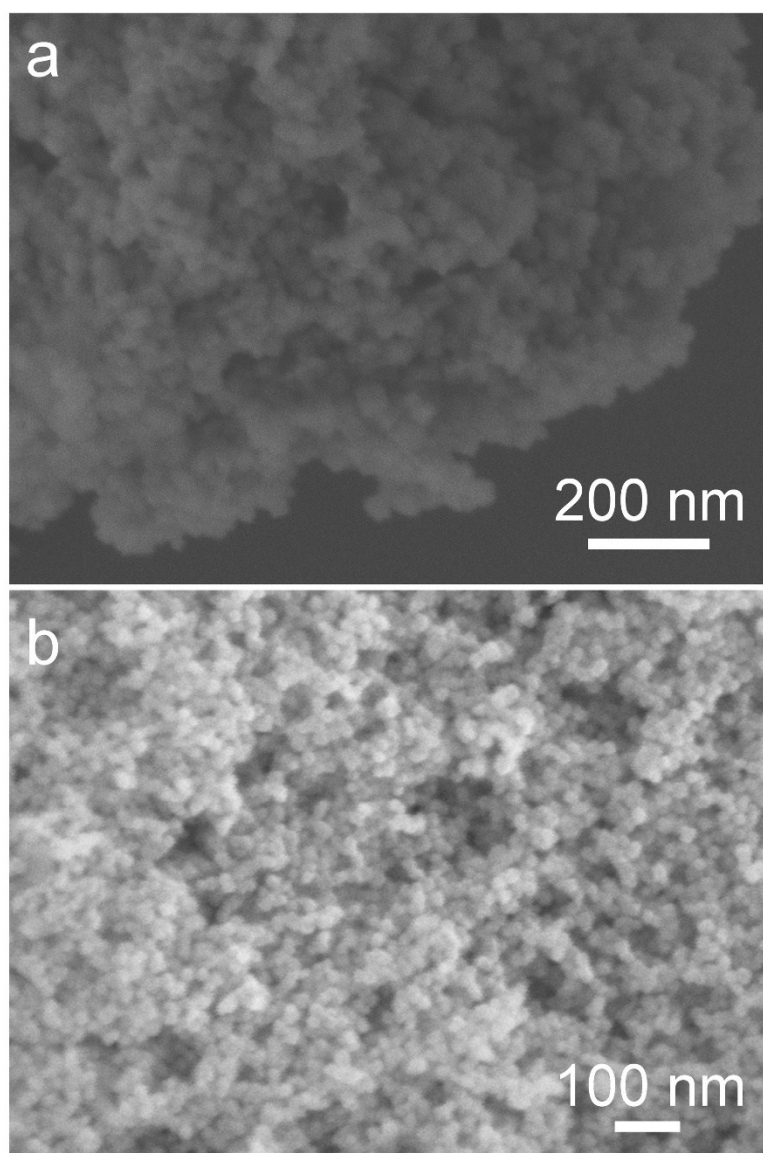

**Figure S1.** SEM images of  $\text{Co}_3\text{O}_4$ .

### 3. TG curve of Co<sub>3</sub>O<sub>4</sub>@Co-MOF-12

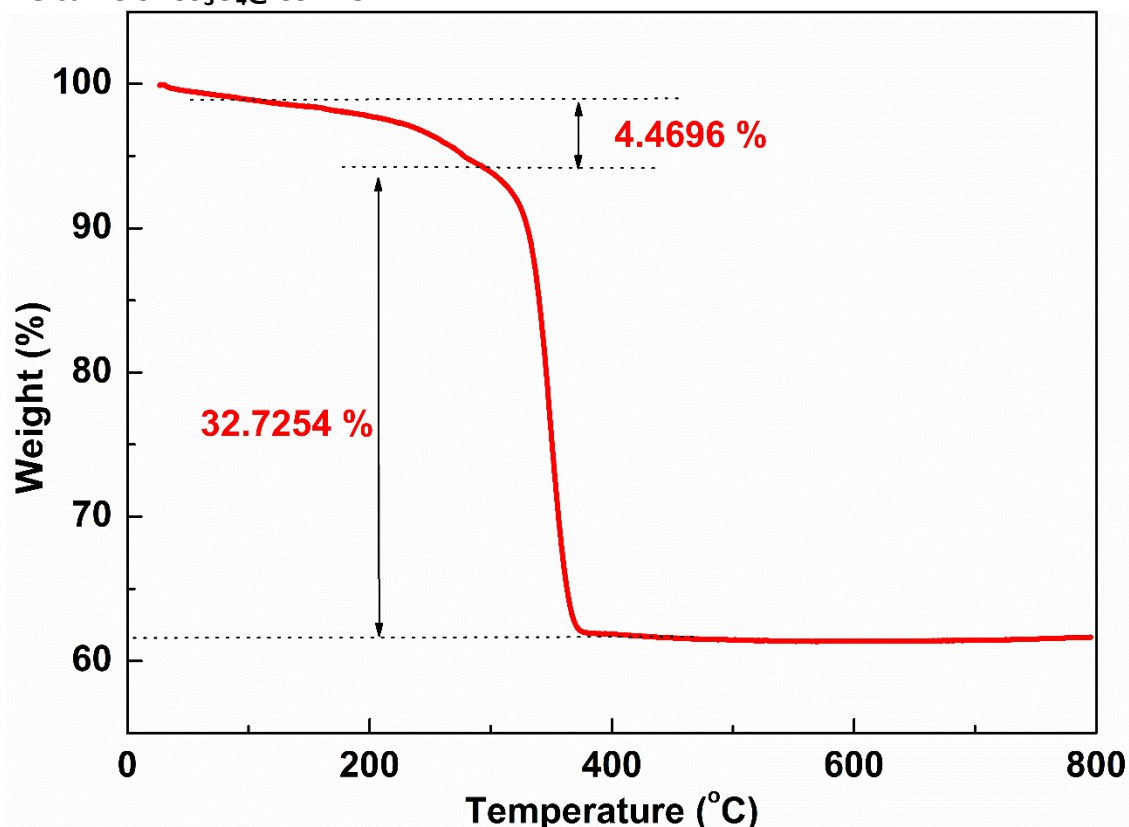

Figure S2. TG curve of Co<sub>3</sub>O<sub>4</sub>@Co-MOF-12.

The mass ratio of Co<sub>3</sub>O<sub>4</sub> and Co-MOF in Co<sub>3</sub>O<sub>4</sub>@Co-MOF-12 composite was measured by TG curve. Co<sub>3</sub>O<sub>4</sub>@Co-MOF-12 shows very high thermal stability up to more than 300 °C. According to the TG analysis (**Figure S2**), Co<sub>3</sub>O<sub>4</sub>@Co-MOF-12 has two consecutive weight-loss step, at 150 and 310 °C, corresponding to the release of the coordinated water molecules (4.4696 wt%) and the loss of organic molecules (32.7254 wt%) due to decarboxylation of the ptcda ligand, respectively. The chemical reaction equations of Co<sub>3</sub>O<sub>4</sub>@Co-MOF-12 for two weight-loss step are as follows:

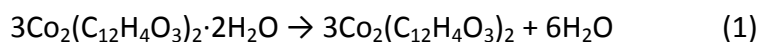

|     |                  |                  |                 |
|-----|------------------|------------------|-----------------|
| $M$ | $M_a = 546.2137$ | $M_b = 510.1831$ | $M_c = 18.0153$ |
|-----|------------------|------------------|-----------------|

|     |       |       |       |
|-----|-------|-------|-------|
| $m$ | $m_a$ | $m_b$ | $m_c$ |
|-----|-------|-------|-------|

|     |       |       |       |
|-----|-------|-------|-------|
| $n$ | $n_a$ | $n_b$ | $n_c$ |
|-----|-------|-------|-------|

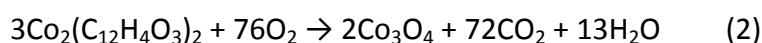

|     |                  |                  |       |       |  |
|-----|------------------|------------------|-------|-------|--|
| $M$ | $M_b = 510.1831$ | $M_d = 240.7972$ |       |       |  |
| $m$ | $m_b$            | $m_d$            | $m_e$ | $m_f$ |  |
| $n$ | $n_b$            | $n_d$            | $n_e$ | $n_f$ |  |

**The known parameters:**

Sample quality before testing:  $m_0 = 1.786$  mg; coordinated water molecules, the ptcda ligand, and  $\text{Co}_3\text{O}_4$  (including Co-MOF decomposition and  $\text{Co}_3\text{O}_4$  from  $\text{Co}_3\text{O}_4@\text{Co-MOF-12}$  composites,  $m_1$ ) of weight percentage was 4.4696 wt%, 32.7254 wt%, and 61.6333 wt%, respectively.

$$n_c = m_c / M_c = m_0 \times 4.4696\% / M_c = 0.004435 \text{ mol}$$

$$n_b = n_a = 3/6 \times n_c = 0.0022174 \quad m_b = n_b \times M_b = 1.13128 \text{ mg}$$

$$m_e + m_f = m_b \times 32.7254\% = 0.370216 \text{ mg}$$

$\text{Co}_3\text{O}_4$  (Co-MOF decomposition):

$$m_d = m_b - (m_e + m_f) = 0.76106 \text{ mg}$$

$\text{Co}_3\text{O}_4$  (Co-MOF decomposition and  $\text{Co}_3\text{O}_4$  from  $\text{Co}_3\text{O}_4@\text{Co-MOF-12}$  composites):

$$m_1 = m_0 \times 61.6333\% = 1.10077 \text{ mg}$$

$\text{Co}_3\text{O}_4$  (from  $\text{Co}_3\text{O}_4@\text{Co-MOF-12}$  composites):

$$m_{\text{Co}_3\text{O}_4} = m_1 - m_d = 0.33971 \text{ mg}$$

Co-MOF (from  $\text{Co}_3\text{O}_4@\text{Co-MOF-12}$  composites):

$$m_a = n_a \times m_a = 1.21118 \text{ mg}$$

The mass/mole ratio of  $\text{Co}_3\text{O}_4/\text{Co-MOF}$  in  $\text{Co}_3\text{O}_4@\text{Co-MOF-12}$  composites:

$$m_a : m_{\text{Co}_3\text{O}_4} = 4 : 1 \quad n_a : n_{\text{Co}_3\text{O}_4} = 1 : 1.5$$

#### 4. SEM image of $\text{Co}_3\text{O}_4$ +Co-MOF

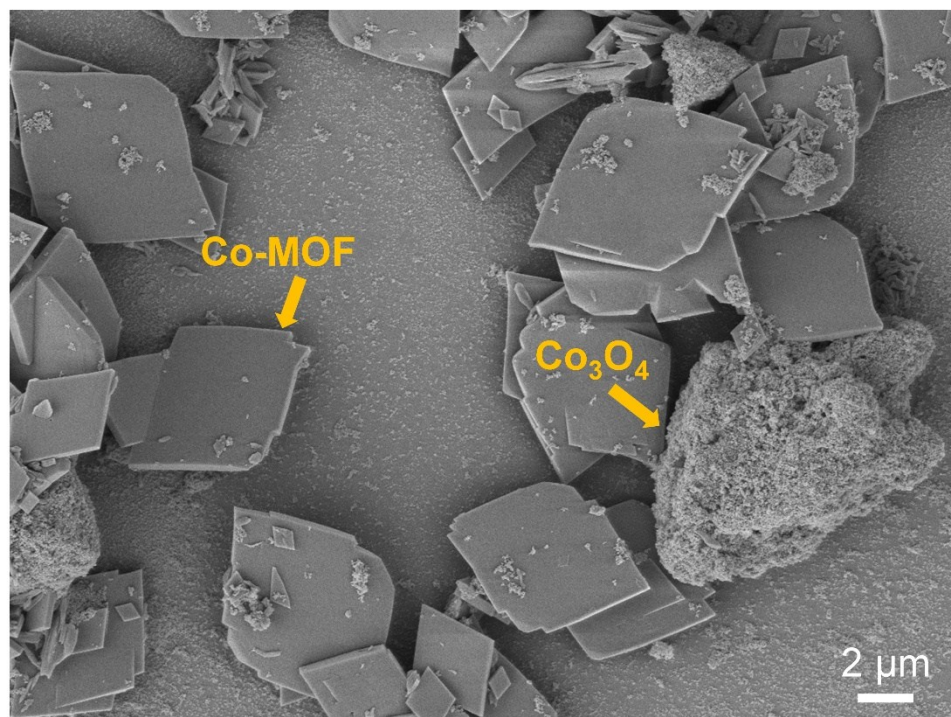

**Figure S3.** SEM image of  $\text{Co}_3\text{O}_4$ +Co-MOF.

## 5. SEM images of Co-based MOFs for different mole ratio of ptcda and NaOH

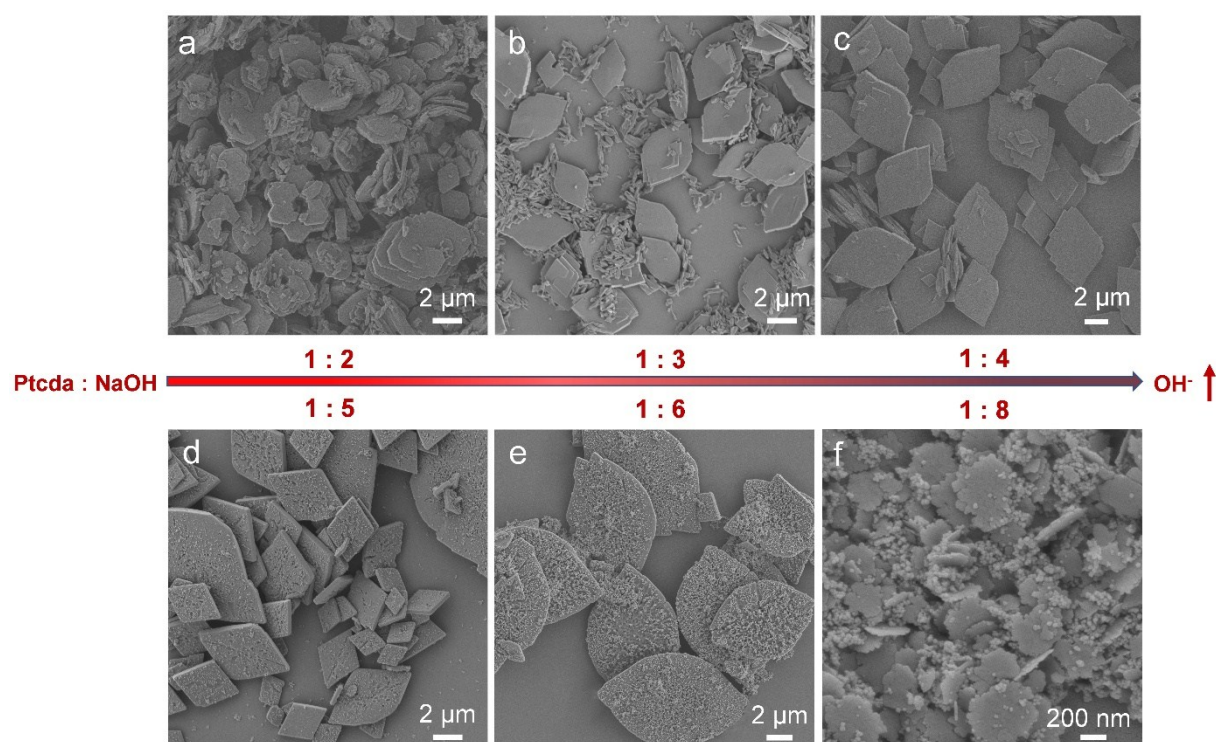

**Figure S4.** SEM images of Co-based MOFs obtained after hydrothermal reaction for different mole ratio of ptcda and NaOH (a) 1 : 2, (b) 1 : 3, (c) 1 : 4, (d) 1 : 5, (e) 1 : 6, and (f) 1 : 8.

In order to study the formation mechanism of  $\text{Co}_3\text{O}_4@\text{Co-MOF}$  composite, a series of Co-based MOFs were synthesised using a similar one-pot solvothermal procedure to that of  $\text{Co}_3\text{O}_4@\text{Co-MOF}$  composite, except for the use of different concentrations of NaOH solution. SEM images (**Figure S4**) show that  $\text{ptcda} : \text{NaOH} = 1 : 2$  and  $1 : 3$  contained the incomplete reaction ptcda. However, uniformity and sheet-like morphology Co-MOF were successfully synthesized when the mole ratio of ptcda and NaOH to  $1 : 4$ . Subsequently, when continues to increase the concentration of NaOH, there are many  $\text{Co}_3\text{O}_4$  nanocubes dispersed on the Co-MOF. Nevertheless, Co-MOF sheet-like morphology completely collapses when the mole ratio of ptcda and NaOH to  $1 : 8$ . This is mainly because of the theoretical complete reaction mole ratio of ptcda and NaOH to  $1 : 4$ , when the concentration of NaOH does not reach the ratio of complete reaction, there are some unreacted ptcda. According to the theoretical complete reaction mole ratio of ptcda and NaOH to  $1 : 4$ , uniformity Co-MOF

were successfully obtained. As the mole ratio of ptcda and NaOH increases to 1 : 5 or 1 : 6, excess OH<sup>-</sup> in the solution form Co(OH)<sub>2</sub> with Co(II) exposed on the surface of Co-MOF, and Co(OH)<sub>2</sub> decomposes into Co<sub>3</sub>O<sub>4</sub> under hydrothermal conditions. However, continue to increase to 1 : 8, Co-MOF structure were completely destroyed. The corresponding XRD patterns (**Figure S5**) further confirmed the above the formation mechanism of Co<sub>3</sub>O<sub>4</sub>@Co-MOF composite.

6. XRD patterns of Co-based MOFs for different mole ratio of ptcda and NaOH

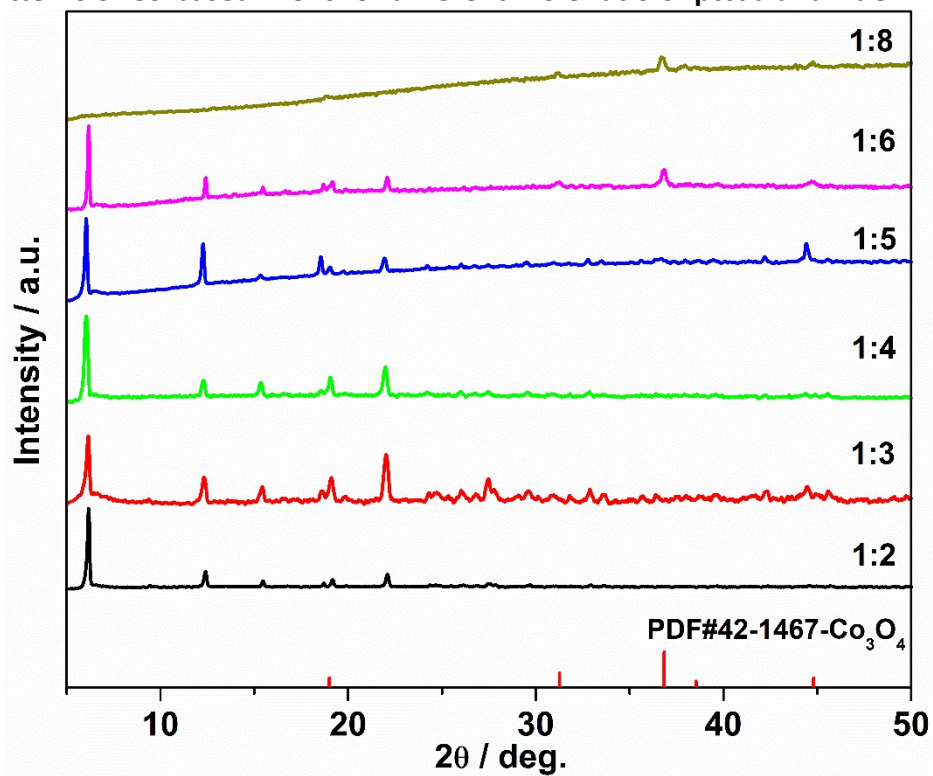

**Figure S5.** XRD patterns of Co-based MOFs obtained after hydrothermal reaction for different mole ratio of ptcda and NaOH.

## 7. SEM images of $\text{Co}_3\text{O}_4@\text{Co-MOF}$ for different times

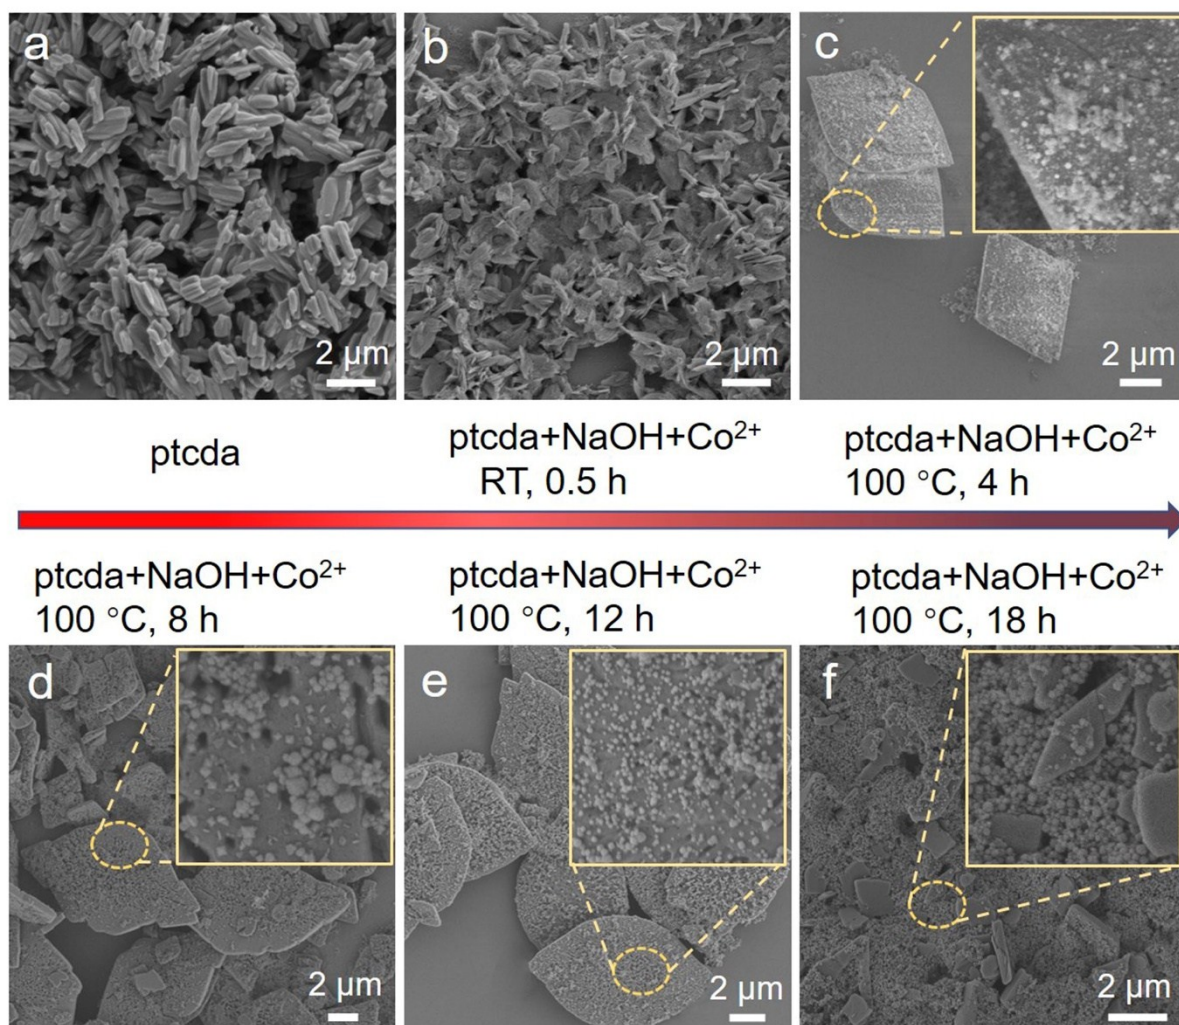

**Figure S6.** SEM images of  $\text{Co}_3\text{O}_4@\text{Co-MOF}$  obtained after hydrothermal reaction for different times (a) ptcda, (b) RT, 0.5 h, (c)  $\text{Co}_3\text{O}_4@\text{Co-MOF}$ -4, (d)  $\text{Co}_3\text{O}_4@\text{Co-MOF}$ -8, (e)  $\text{Co}_3\text{O}_4@\text{Co-MOF}$ -12, and (f)  $\text{Co}_3\text{O}_4@\text{Co-MOF}$ -18.

By controlling the time of reactions, we try to explore the process of  $\text{Co}_3\text{O}_4@\text{Co-MOF}$  composites growth. **Figure S6a-f** shows the SEM images of ptcda and the sample with reaction time of 0.5, 4, 8, 12, and 18 h, respectively. **Figure S7** shows the corresponding XRD patterns. As shown in **Figure S6**, the reaction time clearly affects the growth of  $\text{Co}_3\text{O}_4@\text{Co-MOF}$  composites. When the reaction time is 0.5 h at RT, there is no special morphology generated. As the reaction time is extended to 4 h at 100 °C, Co-MOF generated, and there is only very few  $\text{Co}_3\text{O}_4$  nanocubes generated. Continuing to increase the reaction time to 12 h at 100 °C, the uniformity  $\text{Co}_3\text{O}_4@\text{Co-MOF}$  composites have been obtained, and  $\text{Co}_3\text{O}_4$  nanocubes are

uniformly dispersed on the Co-MOF with nearly no aggregations. After 18 h, we found that Co-MOF sheet-like morphology completely collapses, and  $\text{Co}_3\text{O}_4$  nanocubes agglomeration. Compared with other  $\text{Co}_3\text{O}_4@\text{Co-MOF-t}$  ( $t = 4, 8$  and  $18$  h), the XRD peaks of the sample with reaction time of  $12$  h is much stronger, which demonstrates that the crystallinity becomes best.

8. XRD patterns of  $\text{Co}_3\text{O}_4@\text{Co-MOF}$  for different times

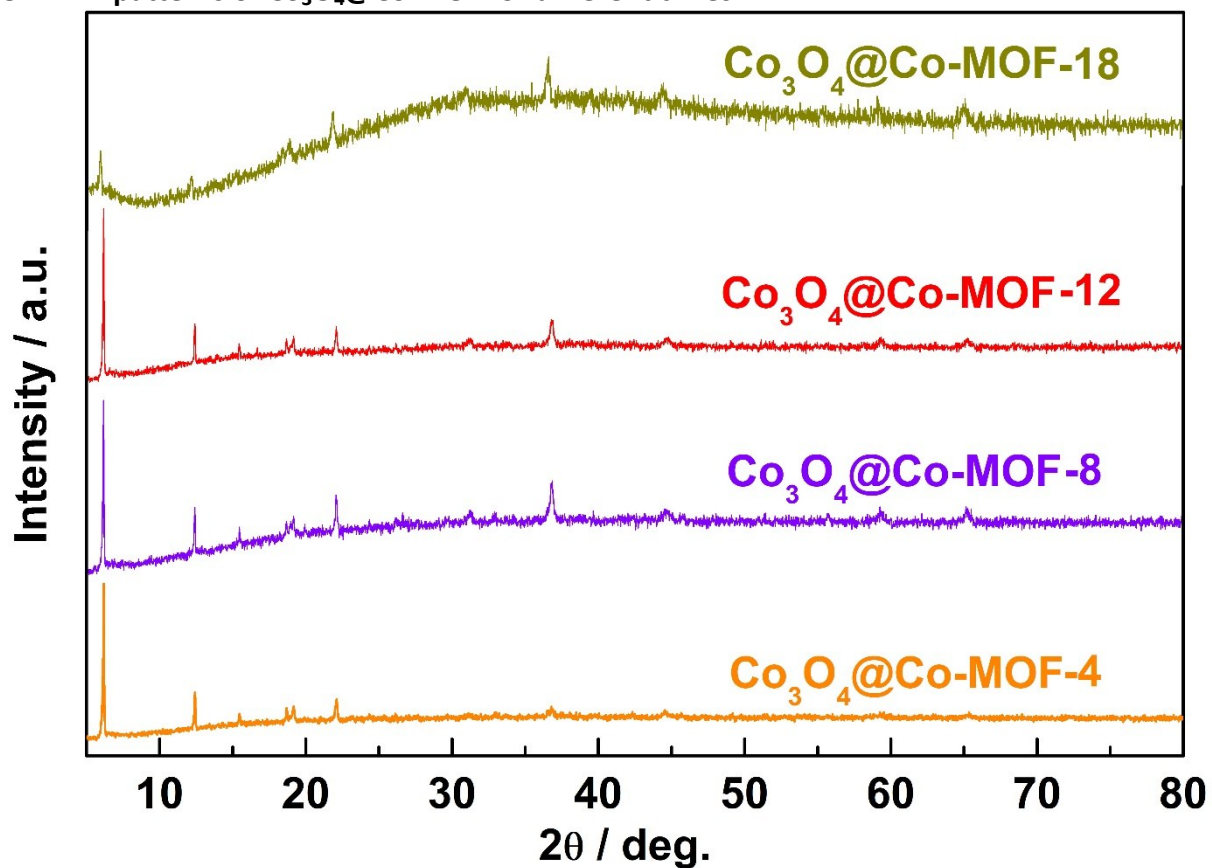

**Figure S7.** XRD patterns of  $\text{Co}_3\text{O}_4@\text{Co-MOF-4}$ ,  $\text{Co}_3\text{O}_4@\text{Co-MOF-8}$ ,  $\text{Co}_3\text{O}_4@\text{Co-MOF-12}$ , and  $\text{Co}_3\text{O}_4@\text{Co-MOF-18}$ .

## 9. The possible formation mechanism for the composite

The possible formation mechanism for the composite is as follows.

The reaction of the ptcda ( $C_{24}H_8O_6$ ) and  $Co^{2+}$  in water at 100 °C for 12 h with a  $C_{24}H_8O_6:NaOH$  ratio of 1:4 results in a uniform Co-MOF ( $Co_2C_{24}H_8O_6(OH)_4$ ) morphology. The following reaction occurs:

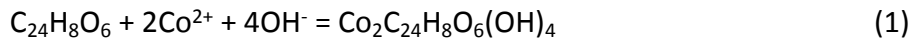

Hence, the reaction equilibrium constant (K) for reaction (1) is as follows:

$$K_{MOF} = \frac{[Co_2C_{24}H_8O_6(OH)_4]}{[Co^{2+}]^2 \times [OH^-]^4 \times [C_{24}H_8O_6]}$$

As the mole ratio of ptcda and NaOH increases to 1:6, excess  $OH^-$  in the solution forms  $Co(OH)_2$  with Co(II) exposed on the surface of the Co-MOF. The following reaction occurs:

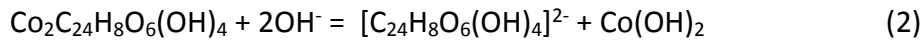

An equation for the overall reaction is as follows:

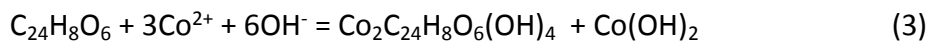

Hence, the reaction equilibrium constant (K) for reaction (3) is as follows:

$$K = \frac{[Co_2C_{24}H_8O_6(OH)_4]}{[Co^{2+}]^3 \times [OH^-]^6 \times [C_{24}H_8O_6]} = \frac{[Co_2C_{24}H_8O_6(OH)_4]}{[Co^{2+}]^2 \times [OH^-]^4 \times [C_{24}H_8O_6] \times K_{MOF}} = \frac{K_{MOF}}{K_{Co(OH)_2}}$$

The formation of  $Co_2C_{24}H_8O_6(OH)_4 \cdot Co(OH)_2$  is caused by the different equilibrium constant K between MOF and  $Co(OH)_2$ . When the  $K_{MOF}$  is far greater than  $K_{Co(OH)_2}$ , i.e., the K for reaction (3) extends far beyond 1, then the formation of  $Co_2C_{24}H_8O_6(OH)_4 \cdot Co(OH)_2$  composites is more likely. In addition,  $Co(OH)_2$  further decomposes into  $Co_3O_4$  under hydrothermal conditions. By

controlling the time of the reactions, the composite obtained at 12 h ( $\text{Co}_3\text{O}_4@\text{Co-MOF-12}$ ) possesses the optimal comprehensive properties, including good crystallinity, an improvement in the size/morphology uniformity and dispersion of the  $\text{Co}_3\text{O}_4$  nanocubes. In addition, the fabrication process mentioned above can be translated to the production of other metal oxide/hydroxide@MOF composites. Ni-MOF hexagonal prisms (**Figure 2e,f**) and Fe-MOF nanobelts (**Figure 2i,j**) were successfully prepared at pH=6-8. At pH=11-13,  $\text{Ni}(\text{OH})_2$  nanosheet@Ni-MOF hexagonal prism ( $\text{Ni}(\text{OH})_2@\text{Ni-MOF}$ , **Figure 2g,h**) and  $\text{Fe}_2\text{O}_3$  nanoparticle@Fe-MOF nanobelt ( $\text{Fe}_2\text{O}_3@\text{Fe-MOF}$ , **Figure 2k,l**) composites were obtained. XRD patterns further verified the successful preparation of  $\text{Ni}(\text{OH})_2@\text{Ni-MOF}$  and  $\text{Fe}_2\text{O}_3@\text{Fe-MOF}$  composites (**Figures S8,9**).

10. XRD patterns of Ni-MOF and Ni(OH)<sub>2</sub>@Ni-MOF

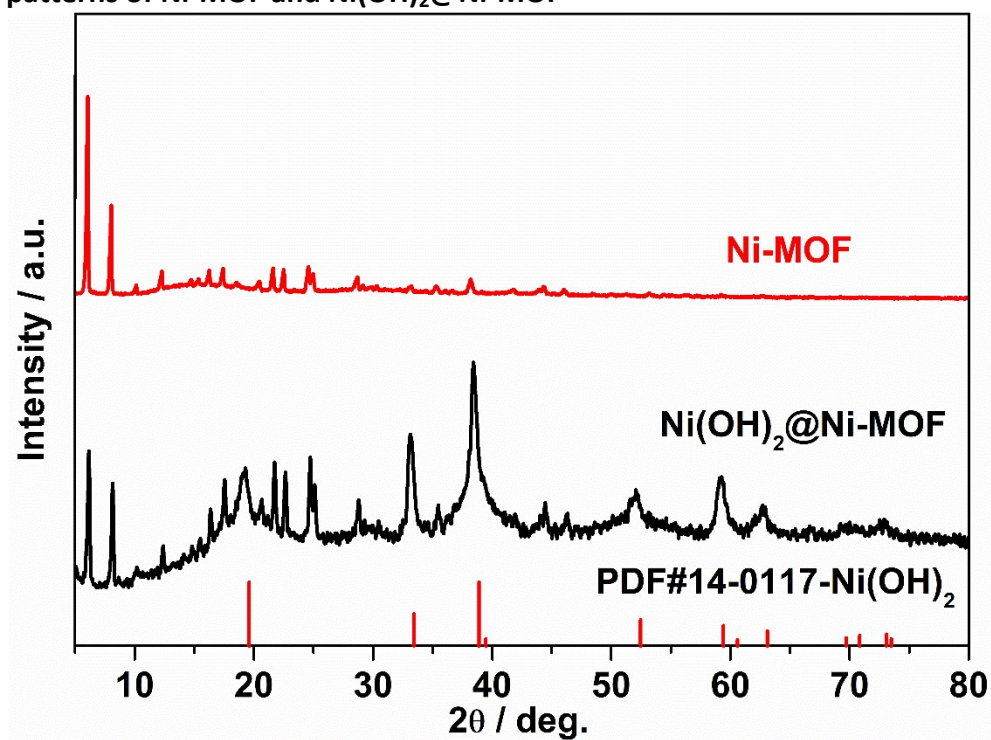

Figure S8. XRD patterns of Ni-MOF and Ni(OH)<sub>2</sub>@Ni-MOF.

### 11. XRD patterns of Fe-MOF and Fe<sub>2</sub>O<sub>3</sub>@Fe-MOF

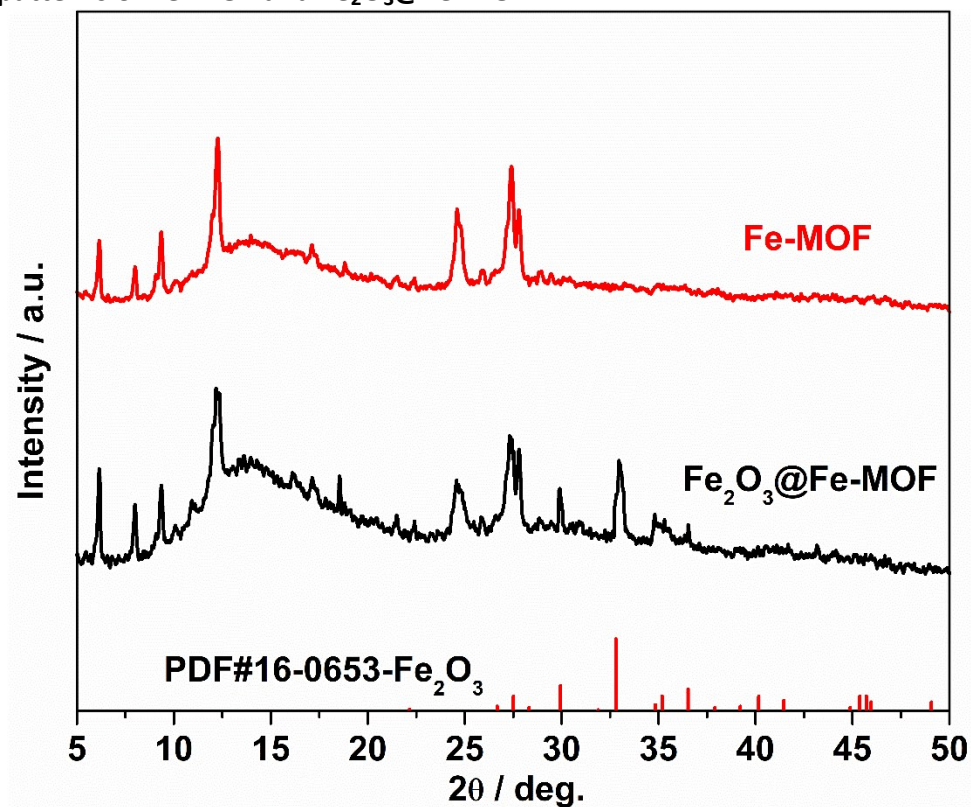

Figure S9. XRD patterns of Fe-MOF and Fe<sub>2</sub>O<sub>3</sub>@Fe-MOF.

## 12. IR pattern

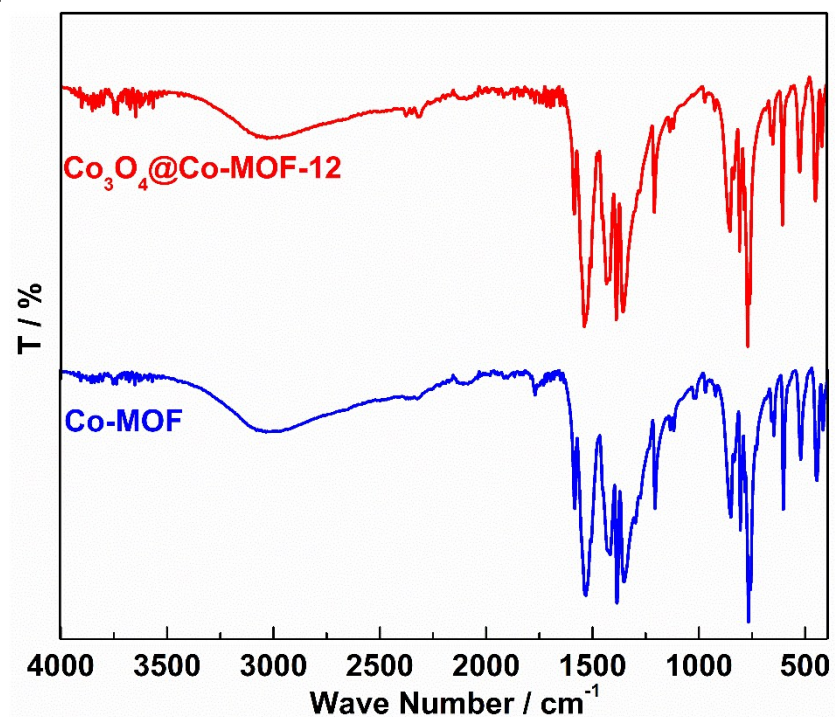

**Figure S10.** IR pattern of Co-MOF, and Co<sub>3</sub>O<sub>4</sub>@Co-MOF.

The Fourier transform infrared (FTIR) spectra of the Co-MOF-based materials are displayed in **Figure S10**. After the reaction of Co<sup>2+</sup> with ptcda, the typical C=O stretching vibrations (1772, 1755, 1741, and 1730 cm<sup>-1</sup>) disappear, and a new strong band at 1535 cm<sup>-1</sup> appears, corresponding to the anti-symmetric stretching vibration of –COO–, confirming the successful coordination of the carboxyl groups to Co<sup>2+</sup>.

13. XRD pattern of  $\text{Co}_3\text{O}_4$

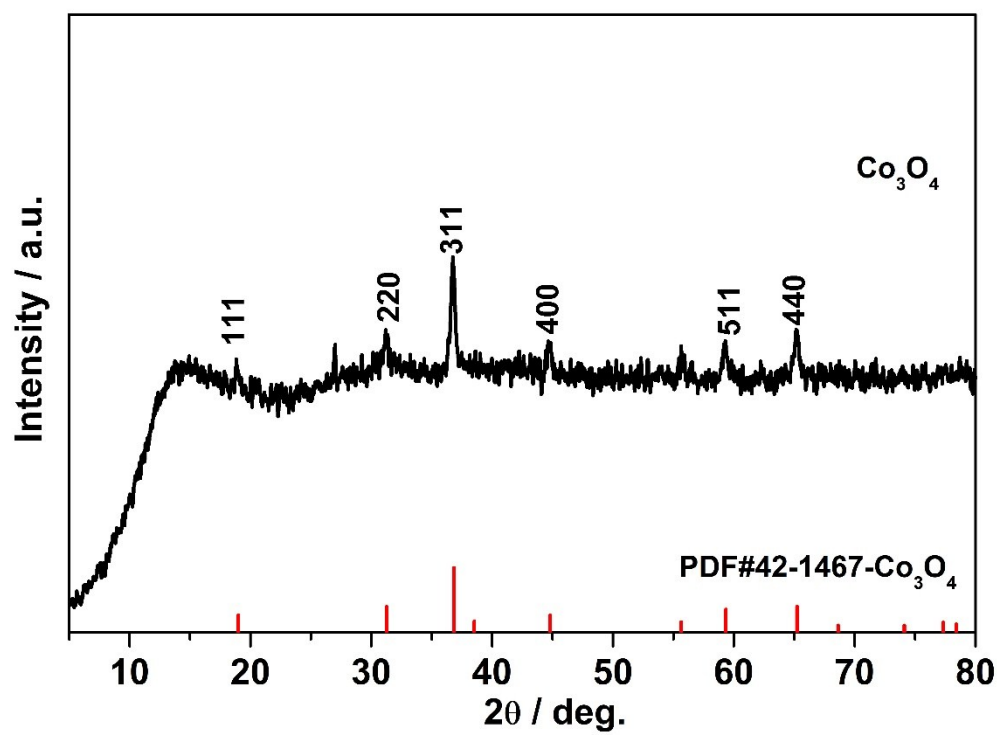

Figure S11. XRD pattern of  $\text{Co}_3\text{O}_4$ .

14. XRD pattern of  $\text{Co}_3\text{O}_4$ +Co-MOF

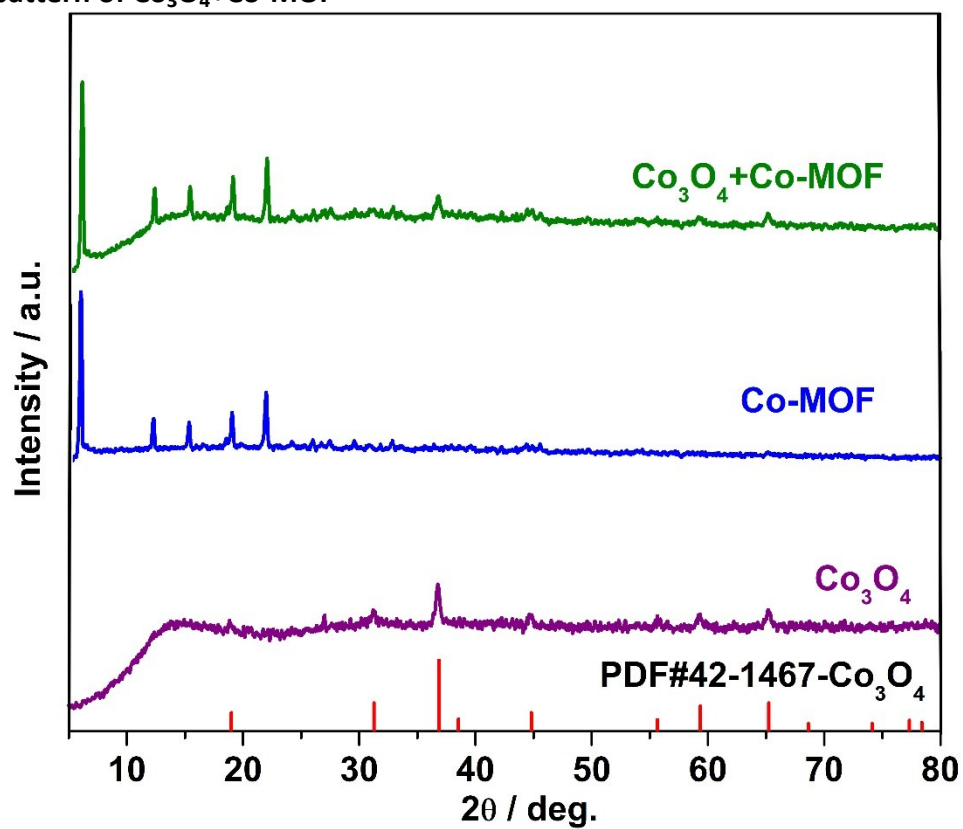

Figure S12. XRD pattern of  $\text{Co}_3\text{O}_4$ +Co-MOF

## 15. XPS spectra of the Co 2p

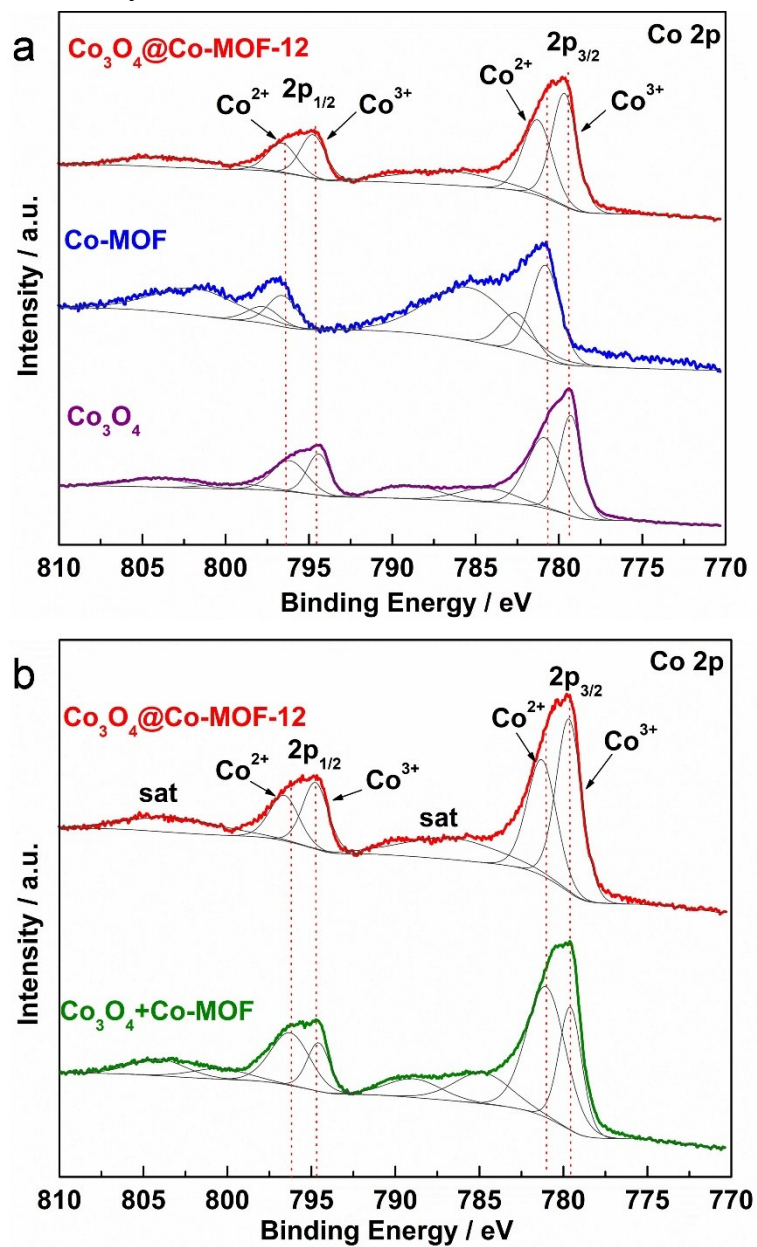

Figure S13. XPS spectra of the Co 2p

## 16. XPS spectra

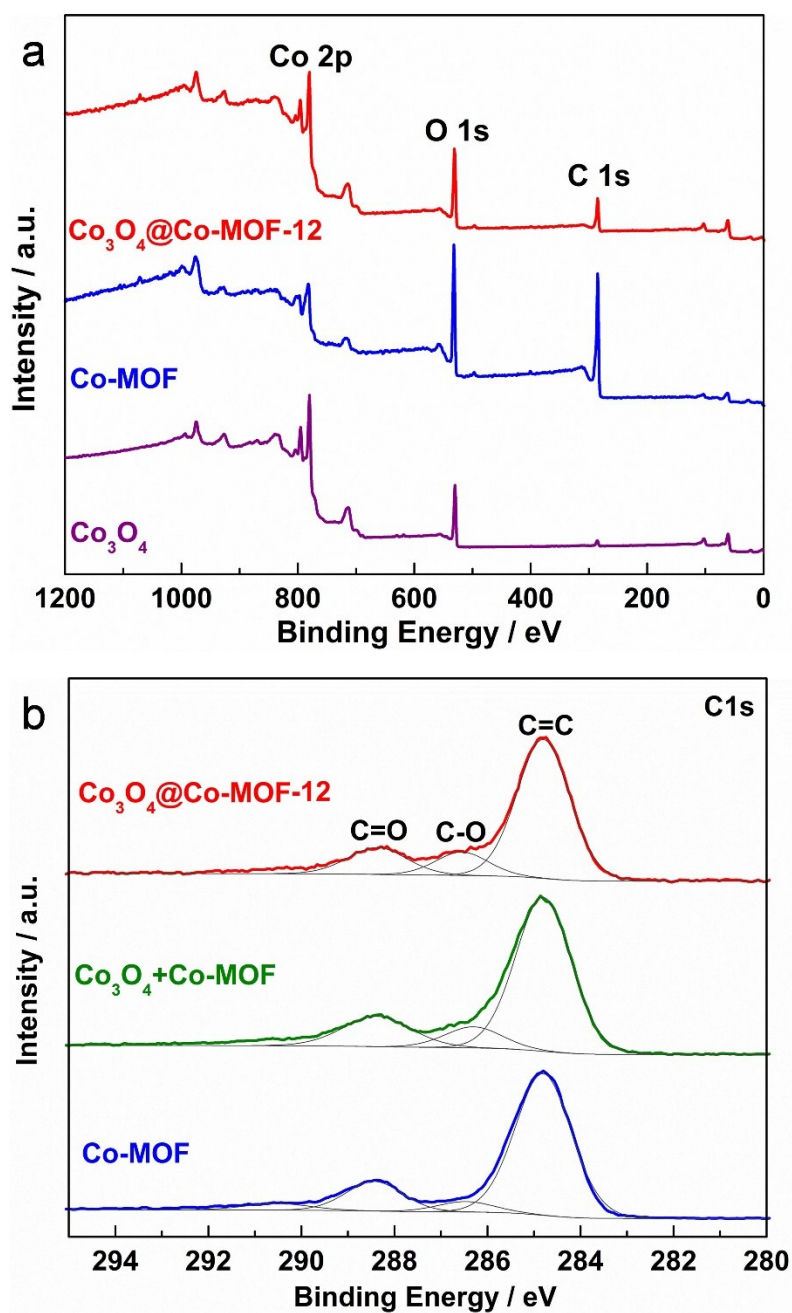

Figure S14. XPS spectra

The C 1s XPS spectra are shown in **Figure S14b**. The possible presence of C=O (288.1 eV), C-O (286.2 eV), and C=C (284.6 eV) species in the C 1s spectrum is shown.

## 17. XPS spectra of the O 1s

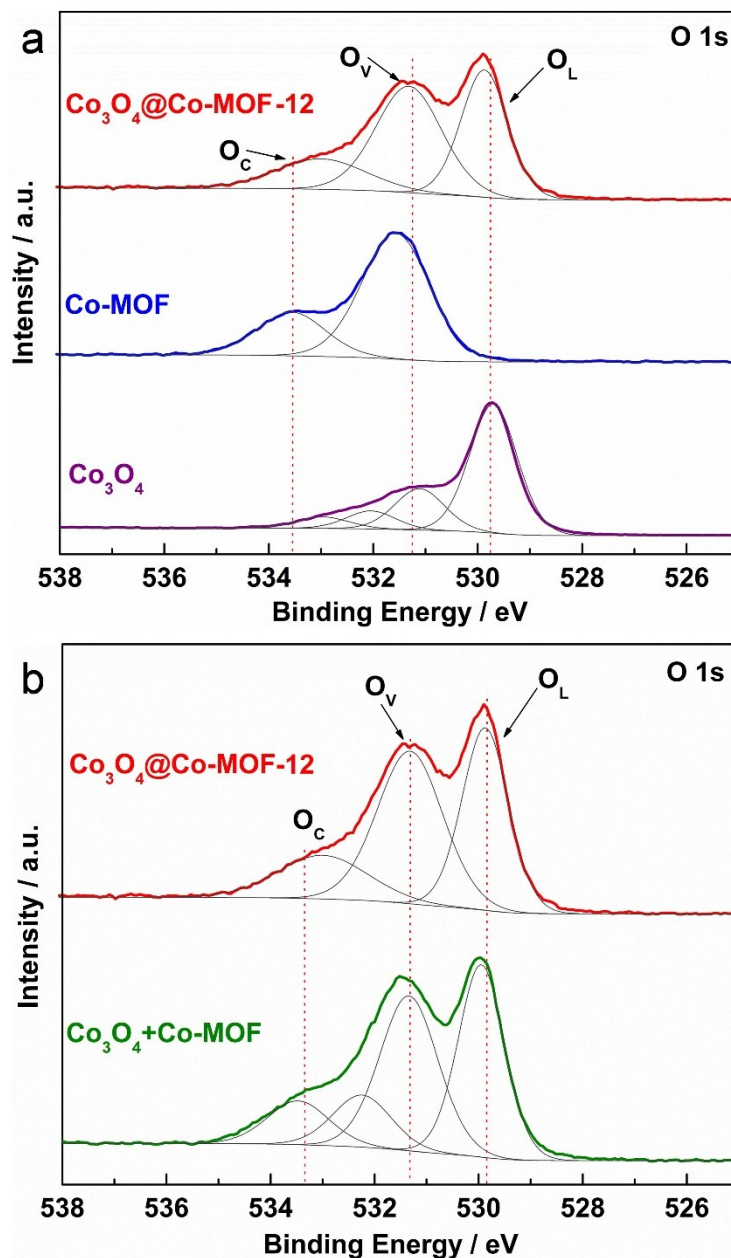

Figure S15. XPS spectra of the O 1s

Figure S15 shows the O 1s XPS spectra, which could be fit with three peaks at 529.7, 531.2, and 533.4 eV, ascribing to the lattice oxygen ( $\text{O}_L$ ), oxygen vacancy ( $\text{O}_V$ ) and chemisorbed oxygen species ( $\text{O}_C$ ), respectively. Furthermore, the  $\text{O}_L$  peaks of  $\text{Co}_3\text{O}_4$ ,  $\text{Co}_3\text{O}_4 + \text{Co-MOF}$  and  $\text{Co}_3\text{O}_4@ \text{Co-MOF-12}$  are also observed, which means that  $\text{Co}_3\text{O}_4$  existed in this system.

# 18. BET

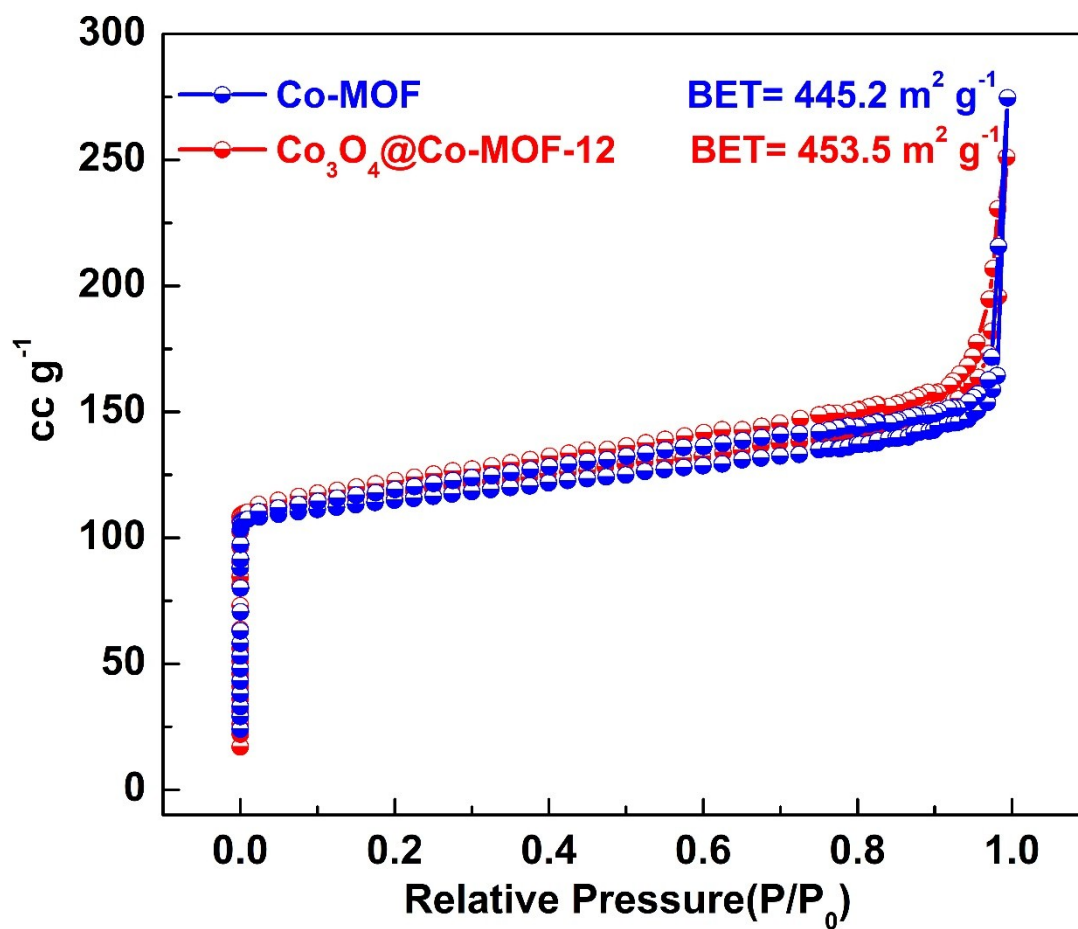

**Figure S16.** N<sub>2</sub> adsorption-desorption isotherm of the Co-MOF and Co<sub>3</sub>O<sub>4</sub>@Co-MOF-12.

## 19. Pore size distribution

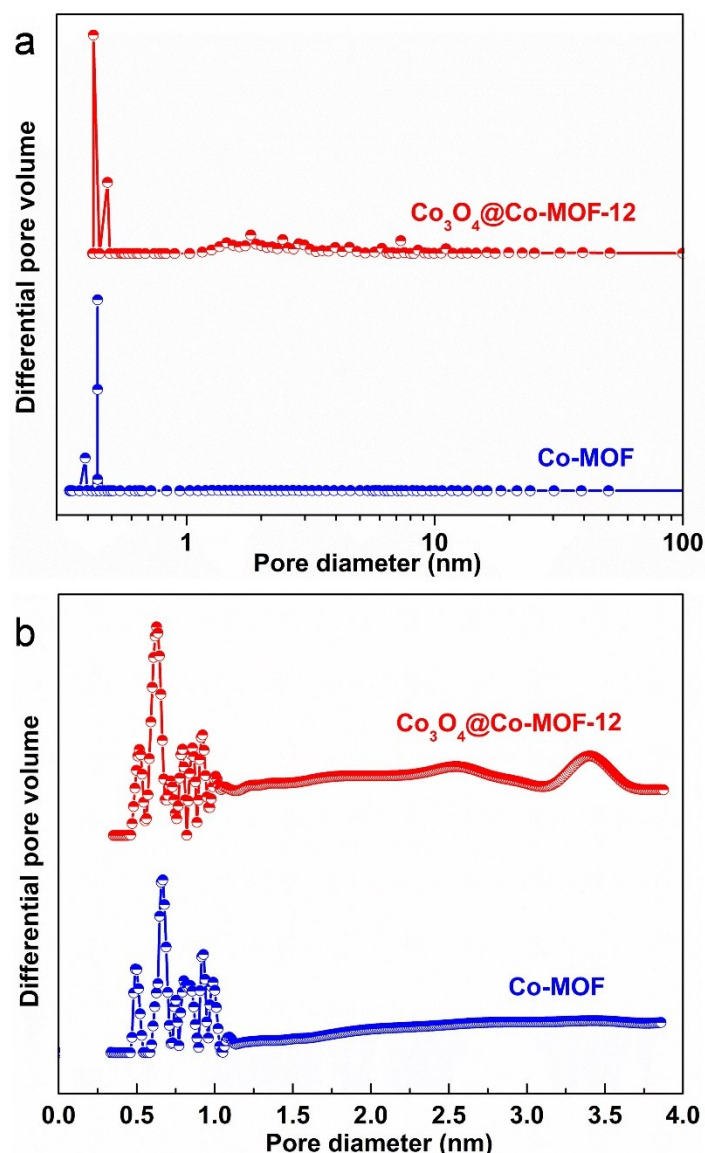

**Figure S17.** The pore size distribution of the Co-MOF and Co<sub>3</sub>O<sub>4</sub>@Co-MOF-12 for the BJH adsorption branch (a) and SF method (b), showing the co-existence of micropores and mesopores in the Co-MOF and Co<sub>3</sub>O<sub>4</sub>@Co-MOF-12.

As shown in **Figure S17**, the pore size distribution for the Barrett-Joyner-Halenda (BJH) adsorption branch implies that the mesopores of the samples are below 20 nm. Furthermore, the pore size distribution was calculated through the Saito-Foley (SF) method and indicated that the micropores were centered at 0.5-1 nm. These results clearly indicate the coexistence of micropores and mesopores in the samples. Therefore, the samples have a high specific surface area.

20. The LSV curves of the  $\text{Co}_3\text{O}_4@\text{Co-MOF-12}$  before and after iR corrections

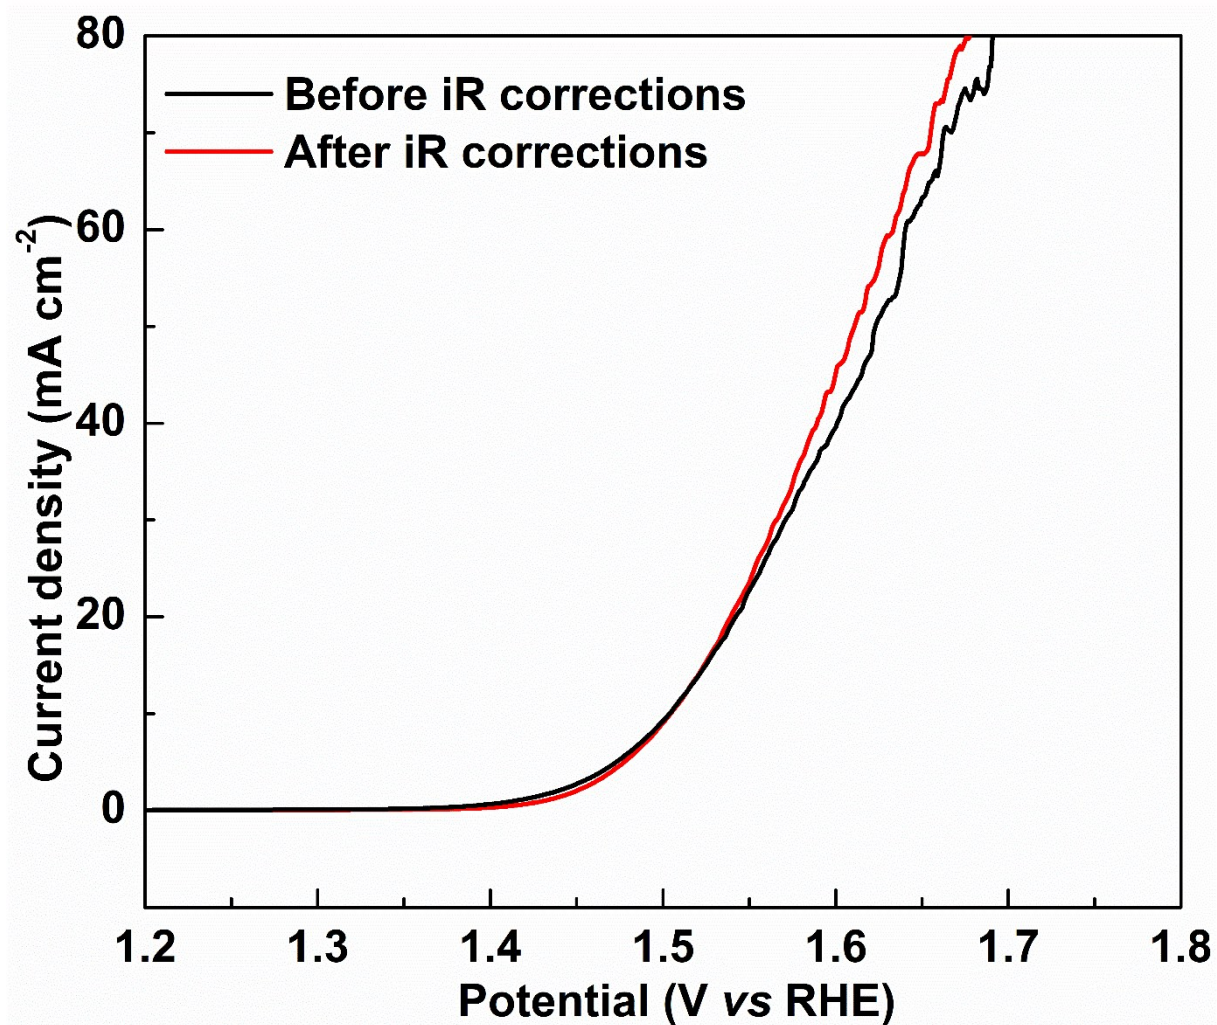

Figure S18. The LSV curves of the  $\text{Co}_3\text{O}_4@\text{Co-MOF-12}$  before and after iR corrections.

## 21. OER performance of RuO<sub>2</sub> and Co<sub>3</sub>O<sub>4</sub>@Co-MOF-t

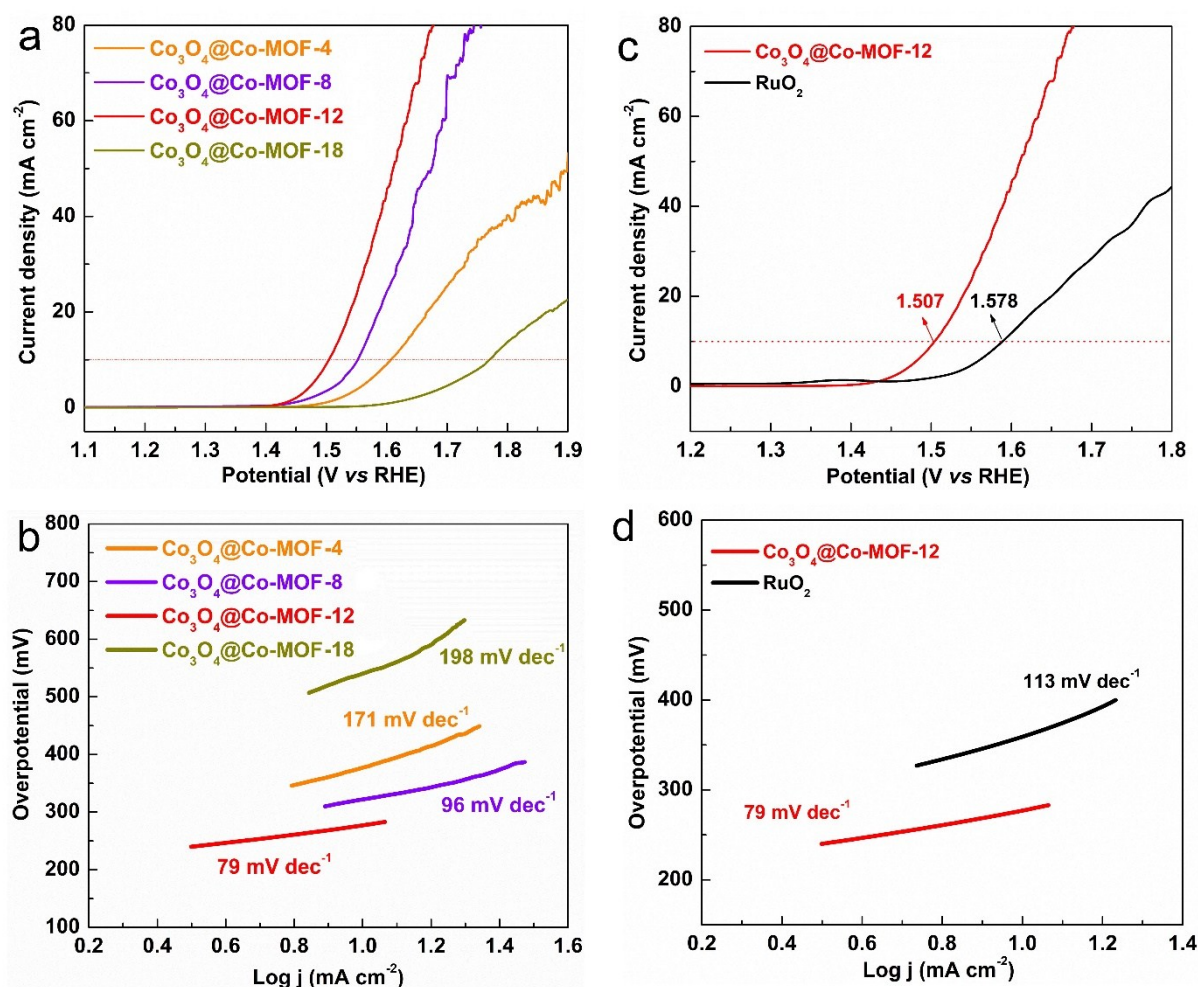

**Figure S19.** OER performance of RuO<sub>2</sub> and Co<sub>3</sub>O<sub>4</sub>@Co-MOF-t: a) LSV curves and b) the corresponding Tafel plots of Co<sub>3</sub>O<sub>4</sub>@Co-MOF-4, Co<sub>3</sub>O<sub>4</sub>@Co-MOF-8, Co<sub>3</sub>O<sub>4</sub>@Co-MOF-12, and Co<sub>3</sub>O<sub>4</sub>@Co-MOF-18. c) LSV curves and d) the corresponding Tafel plots of RuO<sub>2</sub> and Co<sub>3</sub>O<sub>4</sub>@Co-MOF-12.

## 22. CV curves

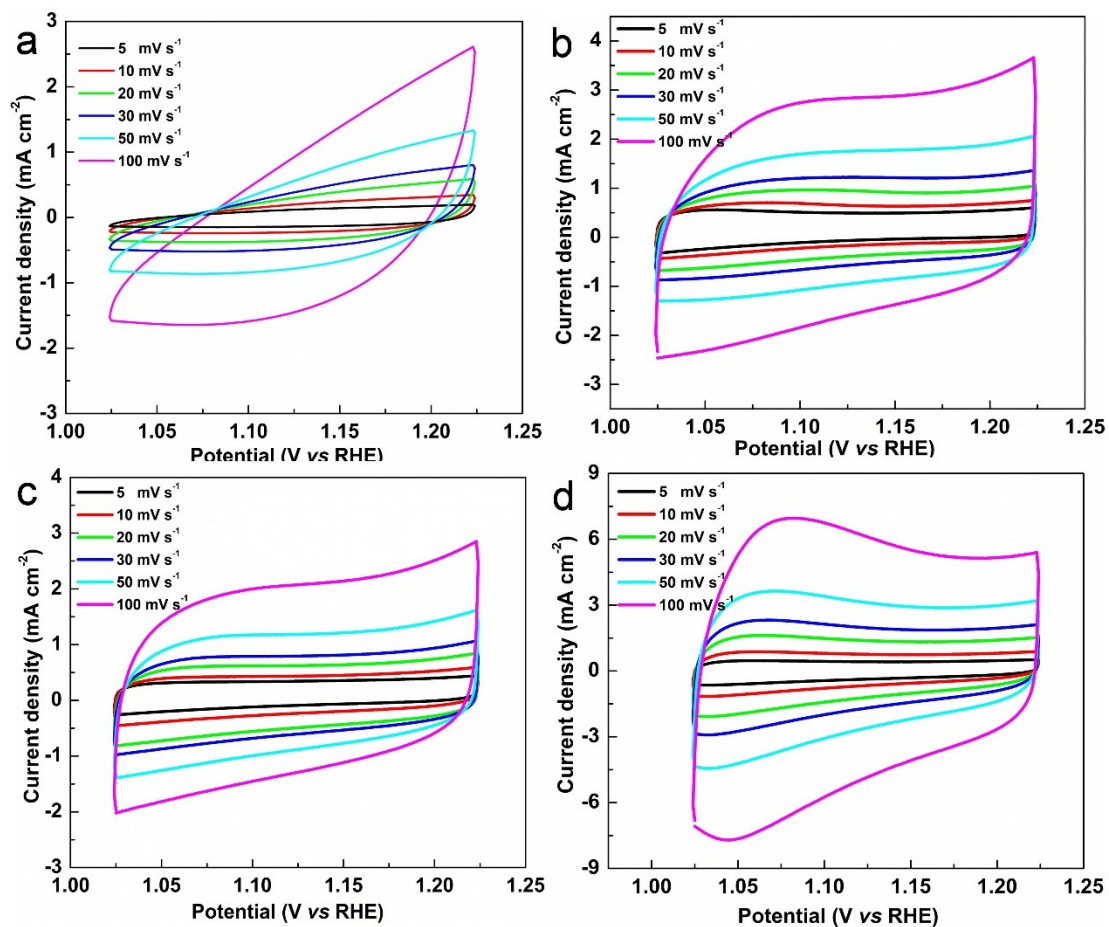

**Figure S20.** Electrochemical capacitance measurements: CV curves of (a) Co<sub>3</sub>O<sub>4</sub>, (b) Co-MOF, (c) Co<sub>3</sub>O<sub>4</sub>+Co-MOF, and (d) Co<sub>3</sub>O<sub>4</sub>@Co-MOF-12 at scan rates from 5 to 100 mV s<sup>-1</sup>.

23. The electrochemical impedance spectra of  $\text{Co}_3\text{O}_4@\text{Co-MOF}$  for different times

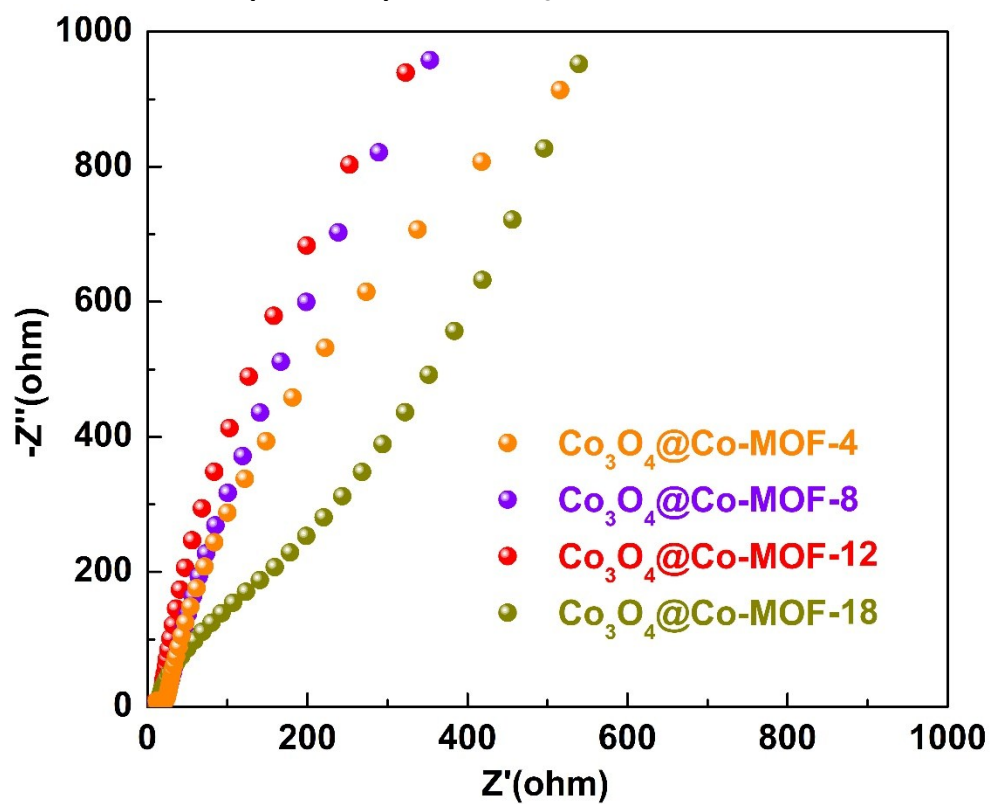

**Figure S21.** The electrochemical impedance spectra of  $\text{Co}_3\text{O}_4@\text{Co-MOF}$  for different times.

## 24. The electrochemical impedance spectra

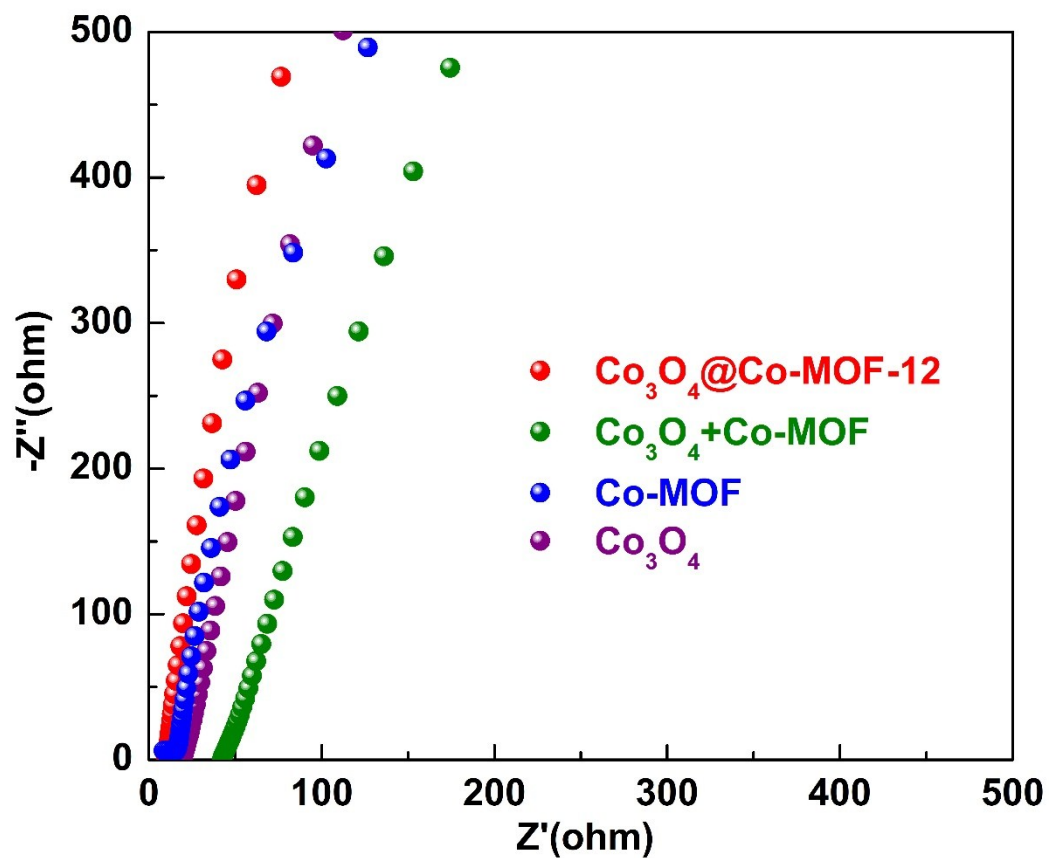

**Figure S22.** The electrochemical impedance spectra of  $\text{Co}_3\text{O}_4$ , Co-MOF,  $\text{Co}_3\text{O}_4 + \text{Co-MOF}$ , and  $\text{Co}_3\text{O}_4@ \text{Co-MOF-12}$ .

25. The electrochemical impedance spectra before and after cycling

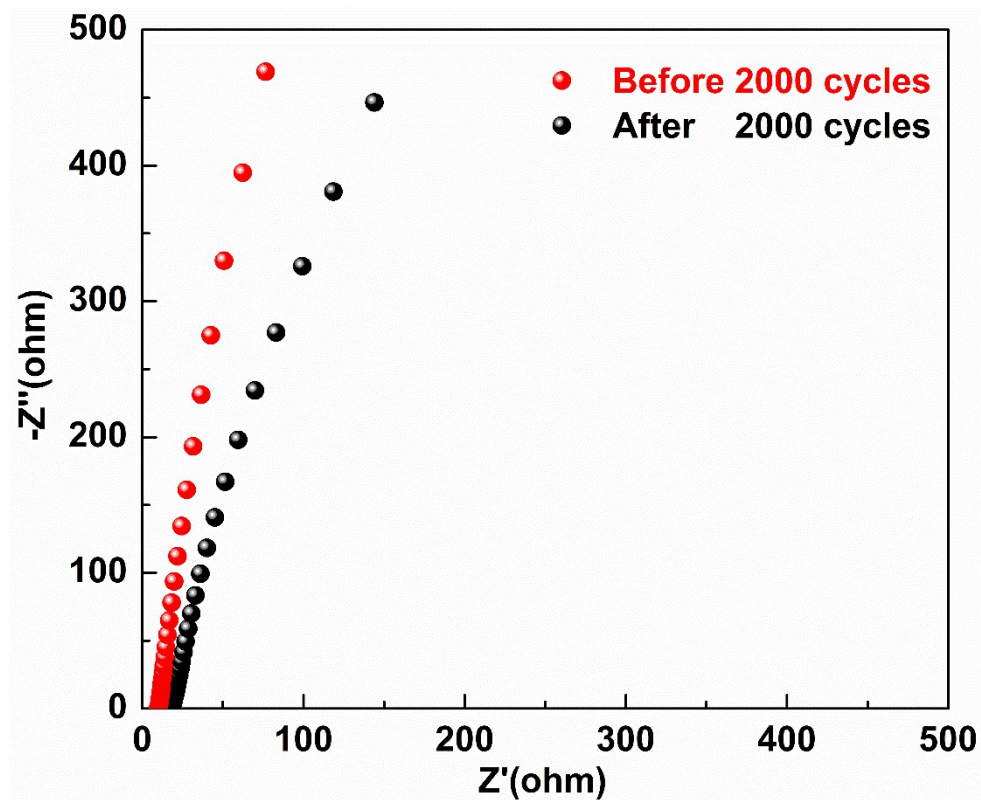

**Figure S23.** The electrochemical impedance spectra of  $\text{Co}_3\text{O}_4@\text{Co-MOF-12}$  before and after cycling for 2000 cycles.

## 26. HER

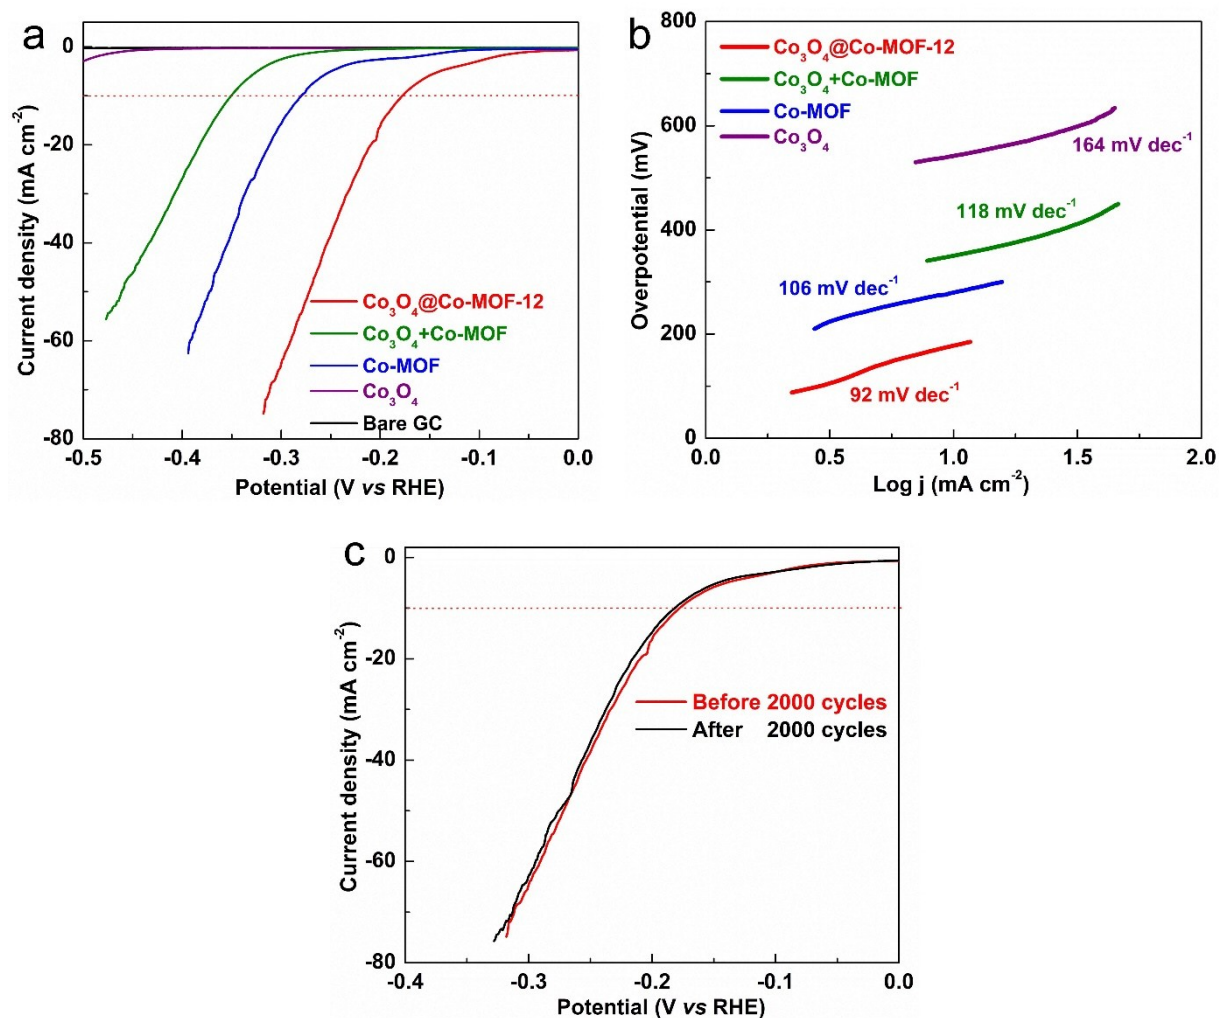

**Figure S24.** HER performance: a) LSV curves and b) the corresponding Tafel plots of  $\text{Co}_3\text{O}_4$ , Co-MOF,  $\text{Co}_3\text{O}_4$ +Co-MOF, and  $\text{Co}_3\text{O}_4$ @Co-MOF-12. c) LSV curves of  $\text{Co}_3\text{O}_4$ @Co-MOF-12 before and after 2000 CV cycles.

## 27. HER performance of Pt/C and $\text{Co}_3\text{O}_4@\text{Co-MOF-12}$

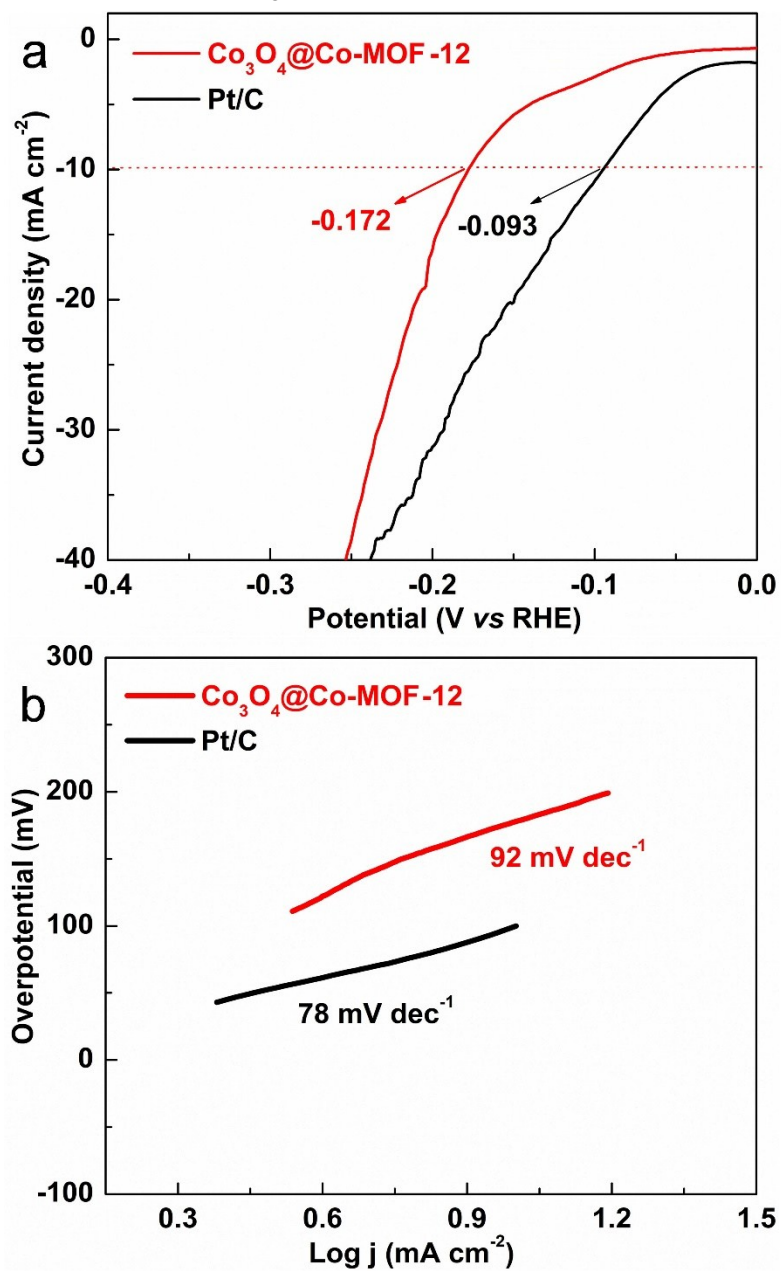

Figure S25. HER performance of Pt/C and  $\text{Co}_3\text{O}_4@\text{Co-MOF-12}$ .

28. LSV curves of  $\text{Co}_3\text{O}_4@\text{Co-MOF-12}$  in a two-electrode system

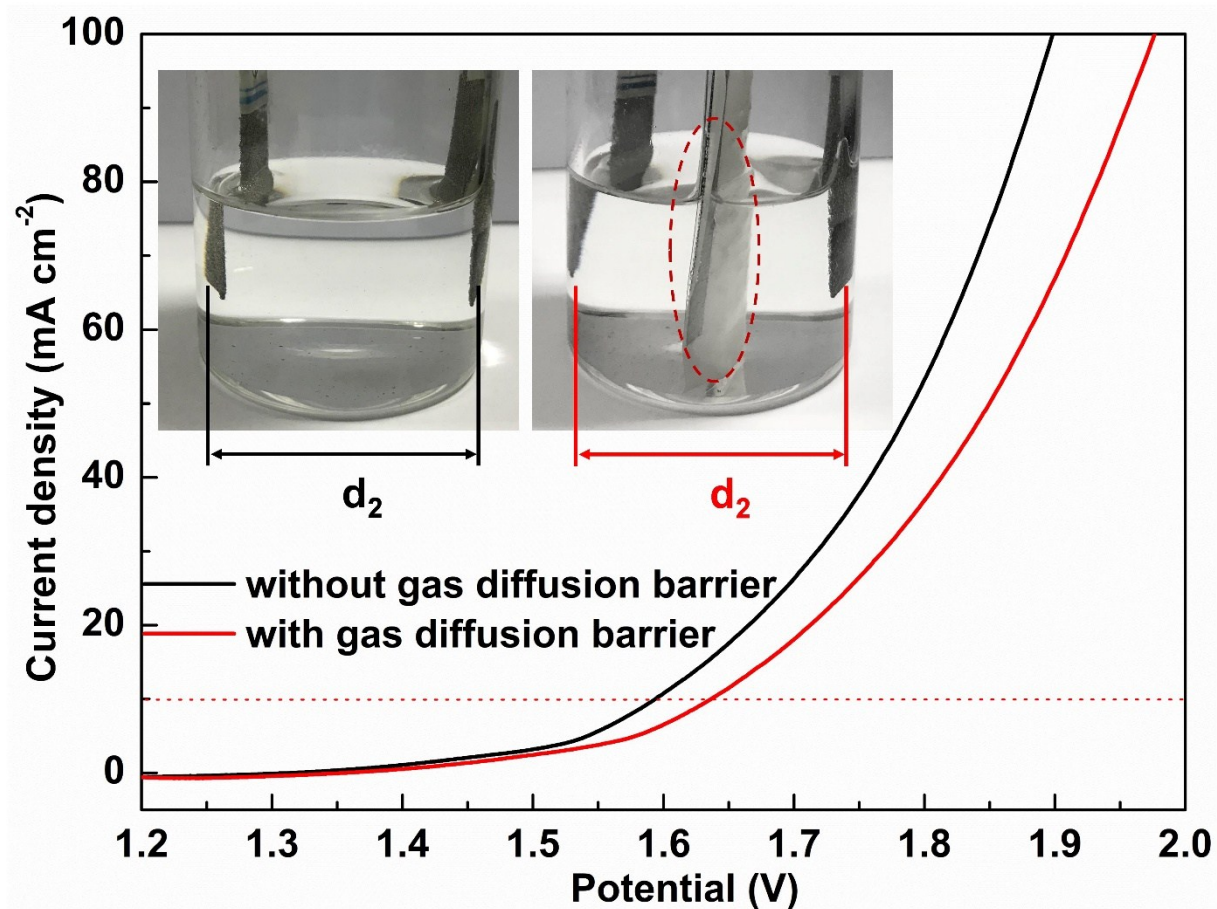

Figure S26. LSV curves of  $\text{Co}_3\text{O}_4@\text{Co-MOF-12}$  with/without gas diffusion barrier at the distance between the two electrodes is  $d_2$ .

29. LSV curves of  $\text{Co}_3\text{O}_4@\text{Co-MOF-12}$  in a two-electrode system

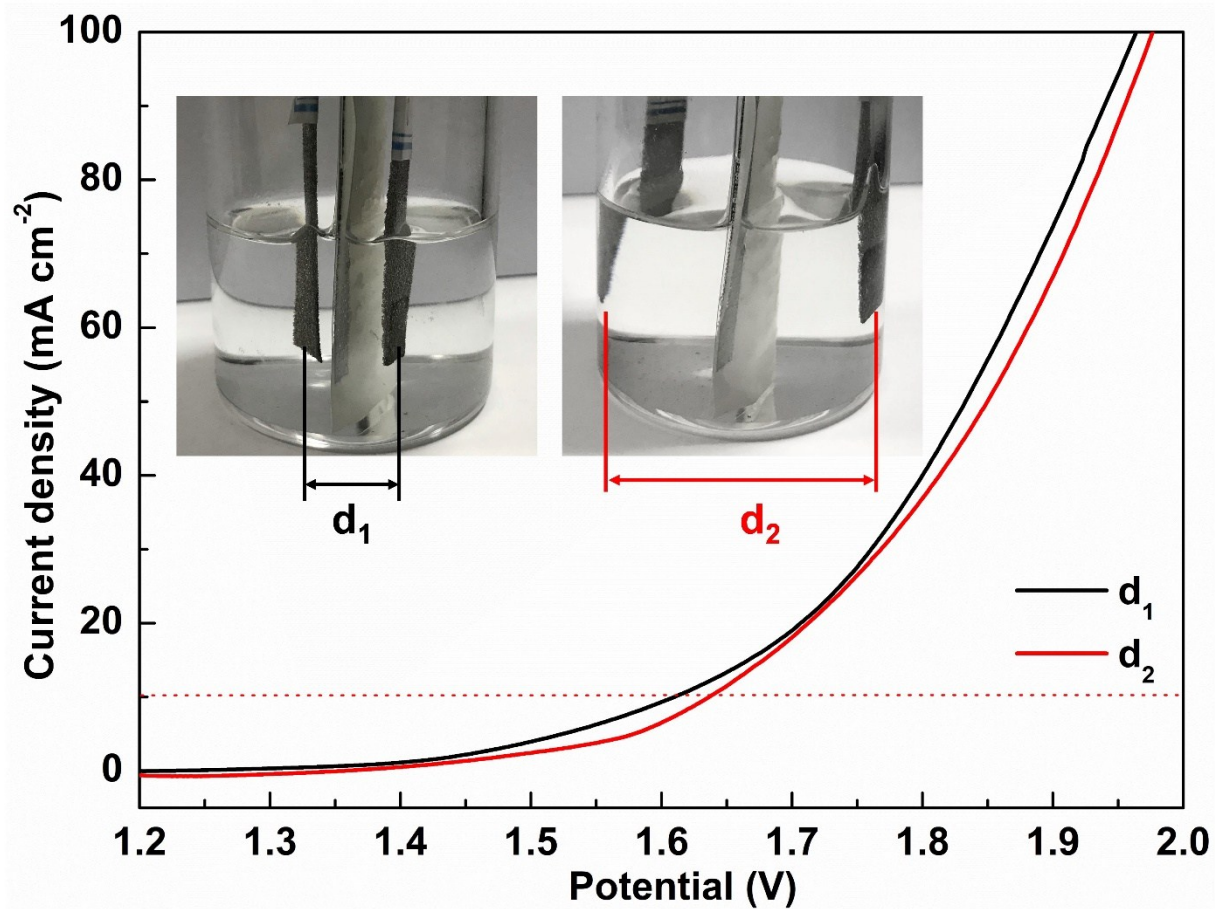

**Figure S27.** LSV curves of  $\text{Co}_3\text{O}_4@\text{Co-MOF-12}$  with gas diffusion barrier at different two electrode spacing ( $d_2 > d_1$ ).

30. LSV curves of  $\text{Co}_3\text{O}_4@\text{Co-MOF-12}$  in a three-electrode system.

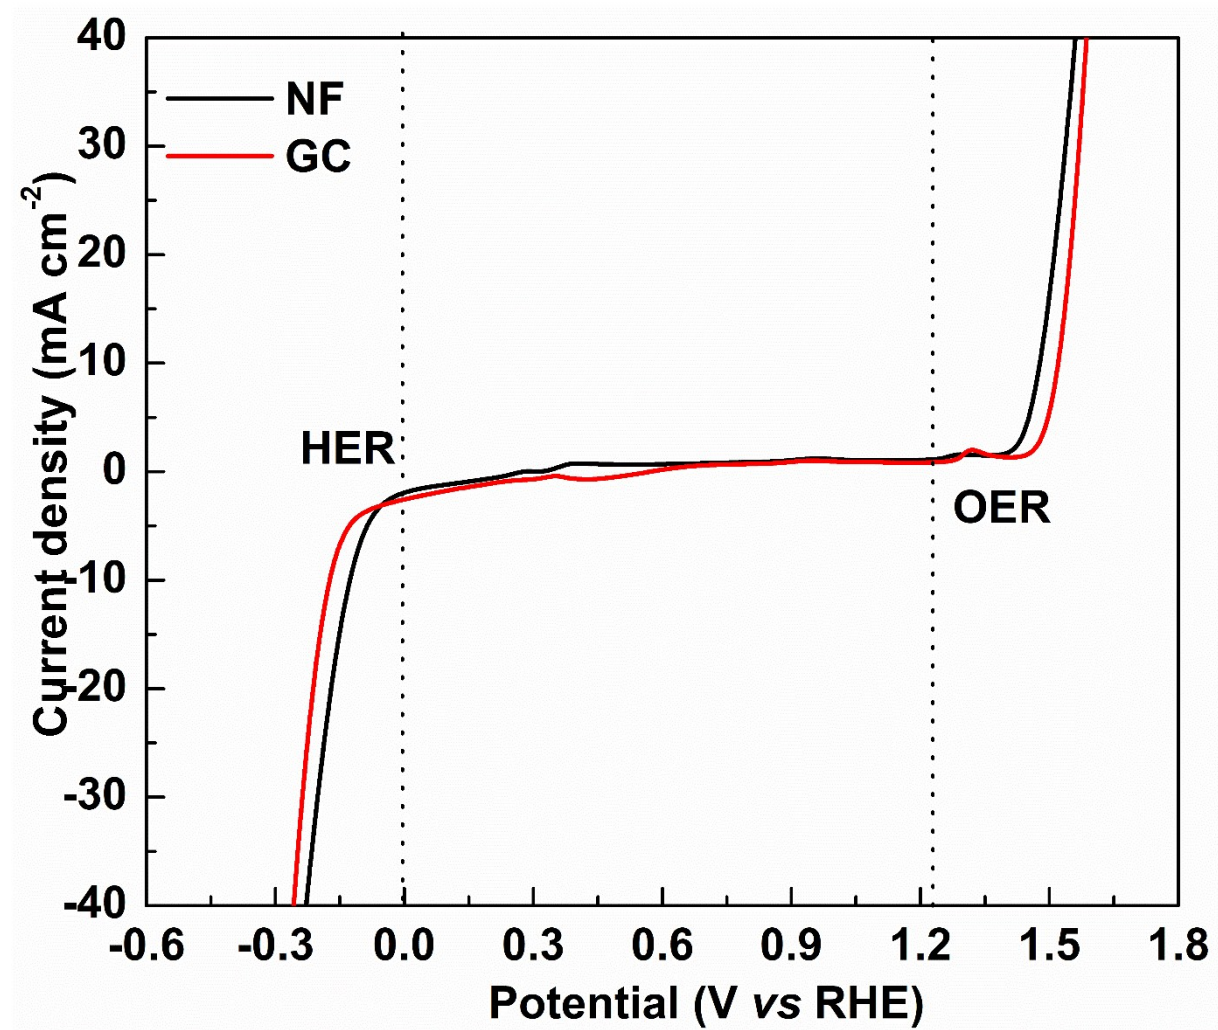

Figure S28. LSV curves of  $\text{Co}_3\text{O}_4@\text{Co-MOF-12}$  based on NF and GC in a three-electrode system.

### 31. Comparison of the OER activities of Co<sub>3</sub>O<sub>4</sub>@Co-MOF-12 and recently reported active catalysts

**Table S1 Comparison of the OER activities of as-prepared Co<sub>3</sub>O<sub>4</sub>@Co-MOF-12 and recently reported active catalysts.**

| Samples                                   | Electrolytes | Overpotential<br>at 10 mA cm <sup>-2</sup><br>(mV vs. RHE) | Tafel slope<br>(mV dec <sup>-1</sup> ) | Substrate | Binder | Ref.      |
|-------------------------------------------|--------------|------------------------------------------------------------|----------------------------------------|-----------|--------|-----------|
| CUMSS-ZIF-67                              | 1 M KOH      | 320                                                        | 53.7                                   | GC        | Nafion | 1         |
| CoO <sub>x</sub> -ZIF                     | 1 M KOH      | 318                                                        | 70.3                                   | GC        | Nafion | 2         |
| Co-NGC@NC                                 | 0.1 M KOH    | 340                                                        | 91                                     | GC        | Nafion | 3         |
| Fe <sub>3</sub> -Co <sub>2</sub> -MOF     | pH = 13      | 283                                                        | 43                                     | GC        | Nafion | 4         |
| Co-doped NH <sub>2</sub> -MIL-53(Fe)      | 0.1 M KOH    | 390                                                        | 72.9                                   | GC        | Nafion | 5         |
| MAF-X27-OH                                | 0.1 M KOH    | 461                                                        | 66                                     | GC        | Nafion | 6         |
| NiFeLDH/CNT                               | 1 M KOH      | 308                                                        | 35                                     | GC        | Nafion | 7         |
| ZIF-67@NPC-2                              | 0.1 M KOH    | 410                                                        | 114                                    | GC        | Nafion | 8         |
| CoMn-LDH                                  | 1 M KOH      | 350                                                        | 43                                     | GC        | —      | 9         |
| Co <sub>3</sub> O <sub>4</sub> @CoO       | pH = 13.6    | 430                                                        | 89                                     | GC        | —      | 10        |
| Co <sub>3</sub> O <sub>4</sub> @Co-MOF-12 | 1 M KOH      | 277                                                        | 79                                     | GC        | Nafion | This work |

### 32. Comparison of the overall water splitting performances of Co<sub>3</sub>O<sub>4</sub>@Co-MOF-12 and recently reported active catalysts

**Table S2 Comparison of the overall water splitting performances of as-prepared Co<sub>3</sub>O<sub>4</sub>@Co-MOF-12 and recently reported active catalysts.**

| Samples                                               | Electrolytes | HER                             |                         | OER                             |                         | Full Cell                                   |  |                                             |  | Ref.      |
|-------------------------------------------------------|--------------|---------------------------------|-------------------------|---------------------------------|-------------------------|---------------------------------------------|--|---------------------------------------------|--|-----------|
|                                                       |              | $\eta$                          | Tafel slope             | $\eta$                          | Tafel slope             | three-electrode                             |  | two-electrode                               |  |           |
|                                                       |              | (mV@10<br>mA cm <sup>-2</sup> ) | (mV dec <sup>-1</sup> ) | (mV@10<br>mA cm <sup>-2</sup> ) | (mV dec <sup>-1</sup> ) | Potential (V@10<br>mA<br>cm <sup>-2</sup> ) |  | Potential (V@10<br>mA<br>cm <sup>-2</sup> ) |  |           |
| Co(OH) <sub>2</sub> @NCNTs                            | 1 M KOH      | 170                             | —                       | 270                             | 72                      | 1.67/NF                                     |  | 1.72/NF                                     |  | 11        |
| FeSe <sub>2</sub>                                     | 1 M KOH      | 178                             | —                       | 245                             | —                       | 1.653/NF                                    |  | 1.73/NF                                     |  | 12        |
| Co <sub>1</sub> Mn <sub>1</sub> CH                    | 1 M KOH      | 180                             | —                       | 294@30                          | —                       | —                                           |  | 1.68/NF                                     |  | 13        |
| Fe-Ni@NC-CNTs                                         | 1 M KOH      | 202                             | —                       | 274                             | —                       | 1.706/NF                                    |  | 1.7/NF                                      |  | 14        |
| S-NiFe <sub>2</sub> O <sub>4</sub>                    | 1 M KOH      | 138                             | 61.3                    | 267                             | 36.7                    | 1.635/NF                                    |  | 1.65/NF                                     |  | 15        |
| MoS <sub>2</sub> -Ni <sub>3</sub> S <sub>2</sub> HNRs | 1 M KOH      | 98                              | 72                      | 200                             | —                       | 1.577/NF                                    |  | 1.5/NF                                      |  | 16        |
| ONPPGC/OCC                                            | 1 M KOH      | 446                             | 154                     | 420                             | 84                      | 2.096/CC                                    |  | 1.66/CC                                     |  | 17        |
| NiFe-MOF                                              | 0.1 M KOH    | 134                             | —                       | 240                             | 34                      | 1.604/NF                                    |  | 1.55/NF                                     |  | 18        |
| NiCo <sub>2</sub> S <sub>4</sub> NW                   | 1 M KOH      | 210                             | 58.9                    | 260                             | 40.1                    | 1.7/NF                                      |  | 1.63/NF                                     |  | 19        |
| (Ni,Co)Se <sub>2</sub> -GA                            | 1 M KOH      | 128                             | 79                      | 320                             | 70                      | 1.678/NF                                    |  | 1.60/NF                                     |  | 20        |
| Co <sub>3</sub> O <sub>4</sub> @Co-MOF-12             | 1 M KOH      | 172                             | 92                      | 277                             | 79                      | 1.679/GC; 1.60/NF                           |  | 1.637/NF                                    |  | This work |

### 33. References

- 1 L. Tao, C. Y. Lin, S. Dou, S. Feng, D. Chen, D. Liu, J. Huo, Z. Xia and S. Wang, *Nano Energy*, 2017, **41**, 417–425.
- 2 S. Dou, C. L. Dong, Z. Hu, Y. C. Huang, J. L. Chen, L. Tao, D. Yan, D. Chen, S. Shen, S. Chou and S. Wang, *Adv. Funct. Mater.*, 2017, **27**, 1–8.
- 3 S. Liu, Z. Wang, S. Zhou, F. Yu, M. Yu, C.-Y. Chiang, W. Zhou, J. Zhao and J. Qiu, *Adv. Mater.*, 2017, **29**, 1700874.
- 4 J.-Q. Shen, P.-Q. Liao, D.-D. Zhou, C.-T. He, J.-X. Wu, W.-X. Zhang, J.-P. Zhang and X.-M. Chen, *J. Am. Chem. Soc.*, 2017, **139**, 1778–1781.
- 5 Y. Han, J. Zhai, L. Zhang and S. Dong, *Nanoscale*, 2016, **8**, 1033–1039.
- 6 X. F. Lu, P. Q. Liao, J. W. Wang, J. X. Wu, X. W. Chen, C. T. He, J. P. Zhang, G. R. Li and X. M. Chen, *J. Am. Chem. Soc.*, 2016, **138**, 8336–8339.
- 7 M. Gong, Y. Li, H. Wang, Y. Liang, J. Z. Wu, J. Zhou, J. Wang, T. Regier, F. Wei and H. Dai, *J. Am. Chem. Soc.*, 2013, **135**, 8452–8455.
- 8 H. Wang, F. X. Yin, B. H. Chen, X. B. He, P. L. Lv, C. Y. Ye and D. J. Liu, *Appl. Catal. B Environ.*, 2017, **205**, 55–67.
- 9 F. Song and X. Hu, *J. Am. Chem. Soc.*, 2014, **136**, 16481–16484.
- 10 C. W. Tung, Y. Y. Hsu, Y. P. Shen, Y. Zheng, T. S. Chan, H. S. Sheu, Y. C. Cheng and H. M. Chen, *Nat. Commun.*, 2015, **6**, 1–9.
- 11 P. Guo, J. Wu, X.-B. Li, J. Luo, W.-M. Lau, H. Liu, X.-L. Sun and L.-M. Liu, *Nano Energy*, 2018, **47**, 96–104.
- 12 C. Panda, P. W. Menezes, C. Walter, S. Yao, M. E. Miehlich, V. Gutkin, K. Meyer and M. Driess, *Angew. Chemie Int. Ed.*, 2017, **56**, 10506–10510.
- 13 T. Tang, W.-J. Jiang, S. Niu, N. Liu, H. Luo, Y.-Y. Chen, S.-F. Jin, F. Gao, L.-J. Wan and J.-S. Hu, *J. Am. Chem. Soc.*, 2017, **139**, 8320–8328.
- 14 X. Zhao, P. Pachfule, S. Li, J. R. J. Simke, J. Schmidt and A. Thomas, *Angew. Chemie*, 2018, **130**, 9059–9064.
- 15 J. Liu, D. Zhu, T. Ling, A. Vasileff and S.-Z. Qiao, *Nano Energy*, 2017, **40**, 264–273.
- 16 Y. Yang, K. Zhang, H. Lin, X. Li, H. C. Chan, L. Yang and Q. Gao, *ACS Catal.*, 2017, **7**, 2357–2366.
- 17 J. Lai, S. Li, F. Wu, M. Saqib, R. Luque and G. Xu, *Energy Environ. Sci.*, 2016, **9**, 1210–1214.
- 18 J. Duan, S. Chen and C. Zhao, *Nat. Commun.*, 2017, **8**, 15341.
- 19 A. Sivanantham, P. Ganesan and S. Shanmugam, *Adv. Funct. Mater.*, 2016, **26**, 4661–4672.
- 20 X. Xu, H. Liang, F. Ming, Z. Qi, Y. Xie and Z. Wang, *ACS Catal.*, 2017, **7**, 6394–6399.
